# Supplementary material for: PIM-COVID study: protocol for a multicentre, longitudinal study measuring the psychological impact of surviving an intensive care admission due to COVID-19 on patients in the UK
Source: PubMed Central journal article supplement — BMJ Open. 2023 Sep 27;13(9):e071730. doi: 10.1136/bmjopen-2023-071730 (PMC10537987; doi:10.1136/bmjopen-2023-071730), 2023-09-27
Supplement: bmjopen-2023-071730.draft_revisions.pdf [file bmjopen-2023-071730.draft_revisions.pdf]

# BMJ Open

BMJ Open is committed to open peer review. As part of this commitment we make the peer review history of every article we publish publicly available.

When an article is published we post the peer reviewers' comments and the authors' responses online. We also post the versions of the paper that were used during peer review. These are the versions that the peer review comments apply to.

The versions of the paper that follow are the versions that were submitted during the peer review process. They are not the versions of record or the final published versions. They should not be cited or distributed as the published version of this manuscript.

BMJ Open is an open access journal and the full, final, typeset and author-corrected version of record of the manuscript is available on our site with no access controls, subscription charges or pay-per-view fees (<http://bmjopen.bmj.com>).

If you have any questions on BMJ Open's open peer review process please email [info.bmjopen@bmj.com](mailto:info.bmjopen@bmj.com)

# BMJ Open

## The Psychological IMPact of surviving an intensive care admission due to COronaVirus Disease 2019 (COVID-19) on patients in the United Kingdom

|                               |                                                                                                                                                                                                                                                                                                                                                                                                                                                                                                                                                                                                                                                                                                                                                                                                                                                                                                                                                                                                                                                     |
|-------------------------------|-----------------------------------------------------------------------------------------------------------------------------------------------------------------------------------------------------------------------------------------------------------------------------------------------------------------------------------------------------------------------------------------------------------------------------------------------------------------------------------------------------------------------------------------------------------------------------------------------------------------------------------------------------------------------------------------------------------------------------------------------------------------------------------------------------------------------------------------------------------------------------------------------------------------------------------------------------------------------------------------------------------------------------------------------------|
| Journal:                      | <i>BMJ Open</i>                                                                                                                                                                                                                                                                                                                                                                                                                                                                                                                                                                                                                                                                                                                                                                                                                                                                                                                                                                                                                                     |
| Manuscript ID                 | bmjopen-2023-071730                                                                                                                                                                                                                                                                                                                                                                                                                                                                                                                                                                                                                                                                                                                                                                                                                                                                                                                                                                                                                                 |
| Article Type:                 | Protocol                                                                                                                                                                                                                                                                                                                                                                                                                                                                                                                                                                                                                                                                                                                                                                                                                                                                                                                                                                                                                                            |
| Date Submitted by the Author: | 17-Jan-2023                                                                                                                                                                                                                                                                                                                                                                                                                                                                                                                                                                                                                                                                                                                                                                                                                                                                                                                                                                                                                                         |
| Complete List of Authors:     | Waite, Alicia; Royal Liverpool University Hospital, Critical Care; University of Liverpool, Institute of Life Course and Medical Sciences<br>Johnston, Brian; Royal Liverpool University Hospital, Critical Care; University of Liverpool, Institute of Life Course and Medical Sciences<br>Boyle, Andrew; Royal Victoria Hospital, Regional Intensive Care Unit<br>Cherry, M. Gemma; University of Liverpool, Department of Primary Care and Mental Health, Institute of Population Health<br>Fisher, Peter; University of Liverpool, Department of Primary Care and Mental Health, Institute of Population Health<br>Brown, Stephen; University of New England, School of Psychology; University of Liverpool, Department of Primary Care and Mental Health, Institute of Population Health<br>Jones, Christina; ICUsteps<br>Williams, Karen; Royal Liverpool University Hospital, Critical Care<br>Welters, Ingeborg; University of Liverpool, Institute of Life Course and Medical Sciences; Royal Liverpool University Hospital, Critical Care |
| Keywords:                     | Anxiety disorders < PSYCHIATRY, Depression & mood disorders < PSYCHIATRY, COVID-19, Quality of Life, Adult intensive & critical care < INTENSIVE & CRITICAL CARE                                                                                                                                                                                                                                                                                                                                                                                                                                                                                                                                                                                                                                                                                                                                                                                                                                                                                    |
|                               |                                                                                                                                                                                                                                                                                                                                                                                                                                                                                                                                                                                                                                                                                                                                                                                                                                                                                                                                                                                                                                                     |

SCHOLARONE™  
Manuscripts

**Title:**

The Psychological Impact of surviving an intensive care admission due to COronaVirus Disease 2019 (COVID-19) on patients in the United Kingdom

**Study Acronym:**

PIM-COVID

**Registries:**

IRAS: 282400

CPMS: 47545

Clinicaltrials.gov: NCT05092529

**Issue date:**

15 March 2021

**Protocol version:**

1.6

**Authors:**

Alicia A C Waite<sup>1,2\*</sup>; Brian Johnston<sup>1, 2</sup>; Andrew J Boyle<sup>3</sup>; Mary Gemma Cherry<sup>4</sup>; Peter Fisher<sup>4</sup>; Stephen Brown<sup>4\*,6</sup>; Christina Jones<sup>5</sup>; Karen Williams<sup>1</sup>; Ingeborg D Welters<sup>1\*, 2</sup>

<sup>1</sup> Intensive Care Unit, Royal Liverpool University Hospital, UK

<sup>2</sup> Institute of Life Course and Medical Sciences, University of Liverpool, UK

<sup>3</sup> Regional Intensive Care Unit, Royal Victoria Hospital, Belfast, UK

<sup>4</sup> Department of Primary Care and Mental Health, Institute of Population Health, University of Liverpool, UK

<sup>5</sup> ICUsteps Charity, Kemp House, 152 City Road, London, UK

<sup>6</sup> School of Psychology, University of New England, Australia

\* Honorary appointment

**Corresponding Author:**

Alicia A C Waite

[alicia.waite@liverpool.ac.uk](mailto:alicia.waite@liverpool.ac.uk)

Intensive Care Unit, Royal Liverpool University Hospital, Prescot Street, Liverpool, L7 8XP

**Study Manager:**

Karen Williams

1  
2  
3  
4  
5 Word count: 3284  
6  
7

8 **Keywords:**

9 Anxiety, Depression, COVID-19, Post intensive care syndrome (PICS), Quality of life,  
10 Trauma  
11  
12  
13  
14  
15

16 **Study Sponsor:**

17 Liverpool University Hospitals NHS Foundation Trust  
18  
19

20 **Sponsor's Reference:** SP0316

21 **Contact name:** Mrs Heather Rogers

22 **Address:** Research Development and Innovation, Royal Liverpool University Hospital,  
23 Liverpool, L7 8XP  
24  
25

26 **Telephone:** +44 (0)151 705 3754

27 **Email:** heather.rogers@liverpoolft.nhs.uk  
28  
29

30  
31 **Study Manager:**

32 Karen Williams  
33  
34  
35  
36  
37  
38  
39  
40  
41  
42  
43  
44  
45  
46  
47  
48  
49  
50  
51  
52  
53  
54  
55  
56  
57  
58  
59  
60

## ABSTRACT

### Introduction

Psychological distress is common in intensive care survivors and is anticipated in those who were treated for severe COVID-19 infection. This trainee-led, multi-centre, observational, longitudinal study aims to assess the psychological outcomes of ICU survivors treated for COVID-19 infection in the United Kingdom.

### Methods and analysis

Questionnaires will be provided to study participants 3, 6 and/or 12 months after discharge from intensive care, assessing for anxiety, depression, post-traumatic stress symptoms, health-related quality of life and physical symptoms. Demographic, psychosocial and clinical data will also be collected to explore risk factors for psychological distress using latent growth curve modelling. Study participants will be eligible to complete questionnaires at any of the three timepoints online, by telephone or by post.

### Ethics

The study was approved by the Health Research Authority (East Midlands - Derby Research and Ethics Committee, reference: 20/EM/0247).

### Trial registration number

NCT05092529; Pre-results

## ARTICLE SUMMARY

### Strengths and Limitations

1. Trainee-led, multi-centre observational study assessing the psychological outcomes in ICU survivors with COVID-19 in the United Kingdom
2. Outcomes are assessed at multiple time points after ICU discharge, allowing an assessment of the trajectory of patient symptoms
3. Findings will be enriched by the inclusion of qualitative data from patient interviews, a survey of team members and an evaluation of available follow-up services.
4. Participants are eligible to join the study at any point up to 12 months post ICU discharge, which improves the temporal scope of the sampling but may lead to variation in response rates at the 3, 6 and 12 month timepoints.

## BACKGROUND

Coronavirus disease 2019 (COVID-19) has led to an extraordinary demand for intensive care support for patients severely affected by SARS-CoV-2. There is an anticipated psychological impact of these intensive care admissions<sup>1</sup> based on previous evidence from intensive care unit (ICU) survivors with acute respiratory distress syndrome (ARDS)<sup>1 2</sup> and from patients treated during previous coronavirus pandemics, namely Severe Acute Respiratory Syndrome (SARS) in 2002-2003 and Middle East Respiratory Syndrome (MERS) in 2012-2013.<sup>3</sup>

Psychological symptoms after an ICU admission may form part of Post Intensive Care Syndrome (PICS), which can also include cognitive and physical impairments that are new or have worsened following ICU admission and persist on discharge from hospital.<sup>4</sup> Between 23 and 38% of ICU patients diagnosed with non-COVID-19 ARDS, prolonged symptoms of anxiety, depression and post-traumatic stress disorder (PTSD) were found, with a median duration of symptoms between 33 and 39 months.<sup>2</sup> Admission to critical care is itself associated with a significant burden of psychological sequelae. Symptoms of anxiety, depression and PTSD have been reported to affect up to 73% of ICU survivors.<sup>5-7</sup> Furthermore, symptoms of anxiety, depression and PTSD can persist in up to 34% of ICU survivors after one year following critical care admission.<sup>5-7</sup> At the peak of the SARS outbreak, patients reported significantly higher stress levels than healthy controls,<sup>8</sup> with 64% of patients reporting symptoms suggesting psychiatric morbidity at 12 months.<sup>9</sup> Data are conflicting regarding the influence of sex on risk for experiencing psychological distress and developing long-term psychiatric morbidity after an ICU admission.<sup>5-7 9 10</sup> Recognised risk factors for emotional distress following ICU admission include previous psychiatric morbidity, receipt of benzodiazepines in ICU, physical restraint and psychiatric symptoms during their admission.<sup>5-7 11</sup> Data from previous pandemics suggests that pandemic-related factors such as quarantine may also have an impact on the psychological wellbeing of ICU survivors.<sup>3</sup>

This will be the first intensive care trainee-led multi-centre study to be conducted in the United Kingdom, facilitated by the Trainee in Intensive Care (TRIC) Network and with support from the National Institute of Health Research (NIHR).

### Study Aims and Objectives

In this study, we aim to assess the short- and long-term psychological impact on patients who have survived an admission to intensive care due to COVID-19 in the United Kingdom, and identify possible predictors of anxiety, depression and post-traumatic stress symptoms in this patient group.

Our primary objective is to identify the proportion of patients surviving an admission to intensive care due to COVID-19 who experience anxiety, depression and/or post-traumatic stress symptoms at 6 months post-discharge, assessed using the Hospital Anxiety and Depression Scale (HADS) and the Impact of Event Scale-6 (IES-6), respectively. Secondary objectives are to identify demographic, clinical, physical and/or psychosocial risk factors for depression, anxiety and/or post-traumatic stress symptoms at 3, 6 and 12 months post discharge from ICU and to assess the feasibility of using a self-reported online questionnaire to examine psychological distress in patients following ICU admission.

## METHODS AND ANALYSIS

### Study Protocol

#### Study Design and Setting

PIM-COVID is a multicentre, longitudinal study involving intensive care units in National Health Service (NHS) hospitals in England, Northern Ireland, Scotland and Wales. Study participants will be invited to participate after discharge from intensive care, following assessment of inclusion and exclusion criteria (see Table 1).

**Table 1: PIM-COVID Study Eligibility Criteria**

| Inclusion Criteria                                                                                    | Exclusion Criteria                                                                                                                     |
|-------------------------------------------------------------------------------------------------------|----------------------------------------------------------------------------------------------------------------------------------------|
| Adult patients aged $\geq 18$ years                                                                   | Unable or unwilling to consent                                                                                                         |
| Diagnosed positive for COVID-19                                                                       | Unable to complete questionnaires                                                                                                      |
| Survived to intensive care / high dependency unit discharge following an admission of $\geq 24$ hours | Unable to speak, understand or communicate in English                                                                                  |
|                                                                                                       | Patients with diagnosed pre-existing cognitive impairment (at the time of ICU admission)                                               |
|                                                                                                       | Patients with no fixed abode, at which postal questionnaire might be not received, and who have no access to a personal email address. |

1  
2  
3 The study has two related components:

4 (1) A multiple cohorts design will be used for point prevalence estimates. We are seeking to  
5 obtain a large sample spanning a long time period. Thus, patients meeting the inclusion criteria  
6 will be approached up to 12 months post ICU discharge, with some entering the study at 3, 6  
7 and 12 month timepoints. Separate prevalence estimates will be made for each follow-up, with  
8 risk factor analysis from clinical data at each timepoint.

9  
10  
11  
12 (2) A nested single cohort design will provide longitudinal analysis. Using patients available at  
13 the 3- and 12-month timepoints, we will estimate individual changes over time and conduct a  
14 longitudinal analysis of risk factors.  
15  
16  
17

### 18 Study Outcomes

19  
20 The primary outcome of the study is the prevalence of anxiety, depression and post-traumatic  
21 stress symptoms in ICU survivors who have been treated for COVID-19 infection. Anxiety and  
22 depression will be assessed using the HADS. Post-traumatic stress symptoms will be  
23 assessed using the IES-6. Exploratory outcomes will use demographic, clinical and physical  
24 data (outlined in Table 2) to identify demographic, clinical, physical and/or psychosocial  
25 predictors of depression, anxiety and/or post-traumatic stress symptoms at 3, 6 and 12 months  
26 after discharge from ICU. Evaluation of psychosocial predictors will use metacognitive beliefs  
27 and processes (thoughts about beliefs and thought processes) and these will be assessed  
28 using the Cognitive Attentional Syndrome Scale-1 (Revised).<sup>12</sup> The feasibility of using a self-  
29 reported online questionnaire to assess anxiety, depression and post-traumatic stress  
30 symptoms in patients following ICU admission will be evaluated using recruitment numbers,  
31 recruitment rate (proportion of those deemed eligible recruited), retention rate (proportion of  
32 participants who provide data at subsequent data capture points), and rate of missing key  
33 data.  
34  
35  
36  
37  
38  
39  
40  
41  
42  
43  
44  
45  
46  
47  
48  
49  
50  
51  
52  
53  
54  
55  
56  
57  
58  
59  
60



**Table 2: Data collected in PIM-COVID study**

|                                                                                              |                                                                                                                                                                                                                                                                                                                                                                                                                                                                            |
|----------------------------------------------------------------------------------------------|----------------------------------------------------------------------------------------------------------------------------------------------------------------------------------------------------------------------------------------------------------------------------------------------------------------------------------------------------------------------------------------------------------------------------------------------------------------------------|
| Demographic Data                                                                             | Age<br>Sex<br>Highest education level obtained<br>Employment status<br>Socioeconomic status (postcode-linked deprivation index)                                                                                                                                                                                                                                                                                                                                            |
| Clinical Data                                                                                | Length of stay in ICU<br>Laboratory diagnosis or suspicion of COVID-19 infection<br>Mental health co-morbidities<br>Physical health co-morbidities<br>Acute Physiologic Assessment and Chronic Health Evaluation (APACHE) II score<br>Ventilatory support during ICU admission<br>Diagnosis of delirium during ICU admission<br>Benzodiazepine requirement during ICU admission (other than as required for intubation)<br>Date of death (if during 12 month study period) |
| Physical Data                                                                                | EQ-5D-5L (used as a subjective assessment of the physical function of participants)                                                                                                                                                                                                                                                                                                                                                                                        |
| Psychological Data                                                                           | <i>Anxiety:</i> Hospital Anxiety and Depression Scale (HADS)*<br>EQ-5D-5L*<br><i>Depression:</i> Hospital Anxiety and Depression Scale (HADS)*<br>EQ-5D-5L*<br><i>Trauma symptoms:</i> Impact of Event Scale-6 (IES-6)*                                                                                                                                                                                                                                                    |
| Metacognitive beliefs and processes                                                          | Cognitive Attentional Syndrome Scale-1 Revised (CAS-1R) *                                                                                                                                                                                                                                                                                                                                                                                                                  |
| * Self reported questionnaires administered at 3, 6 and/or 12 months following ICU discharge |                                                                                                                                                                                                                                                                                                                                                                                                                                                                            |

***Hospital and Anxiety Depression Scale (HADS)***

The HADS is a 14-item self-report measure in which participants rate the presence of symptoms of anxiety (7 items) and depression (7 items) over the preceding week using a 4-point Likert scale, with options from 0 (absence) to 3 (extreme presence). Responses are summed to produce two subscale scores, ranging from 0-21, with higher scores indicative of higher anxiety and depression levels, respectively. The HADS is widely used to assess

1  
2  
3 anxiety and depression in people with physical health difficulties and demonstrates good  
4 psychometric properties when used in an intensive care setting.<sup>13</sup> Cut-off scores of  $\geq 8$  on  
5 anxiety and depression subscales of the HADS have been used to define caseness, with a  
6 score of 8-10 being 'borderline abnormal' and a score of 11-21 indicating anxiety or  
7 depression.<sup>13 14</sup>  
8  
9  
10

### 11 12 *Impact of Event Scale-6 (IES-6)*

13  
14 The IES-6 is a validated tool in survivors of ARDS to screen for post-traumatic stress  
15 disorder. It is an abbreviated version of the Impact of Event Scale-Revised (IES-R) test and  
16 contains six questions.<sup>15</sup> We selected the IES-6 over the IES-R because it is shorter, has  
17 been validated in a very similar patient population,<sup>15</sup> will provide similar information to the  
18 IES-R, and is likely to have a higher completion rate by patients because of its length in the  
19 context of participants commonly experiencing a reduced concentration span following ICU  
20 admission.<sup>4</sup>  
21  
22  
23  
24  
25

### 26 27 *EuroQol 5-dimension, 5-level questionnaire (EQ-5D-5L)*

28  
29 The EQ-5D-5L is a five-domain, self-report measure assessing mobility, self-care, usual  
30 activities, pain/discomfort and anxiety/depression. Participants are asked to rate each  
31 question, indicating no problems, slight problems, moderate problems, severe problems or  
32 extreme problems. In addition, participants are invited to rate their health on a visual  
33 analogue scale from 0-100, where zero represents the worst health imaginable and 100  
34 represents the best health imaginable. EQ-5D-5L is the recommended questionnaire to  
35 assess the HRQoL of critically ill patients.<sup>16</sup>  
36  
37  
38  
39  
40

### 41 42 *Cognitive Attentional Syndrome Scale-1 Revised (CAS-1R)*

43  
44 The CAS-1R is a 10-item self-report measure assessing positive and negative metacognitive  
45 beliefs, frequency of worry or rumination and the use of a range of counterproductive coping  
46 strategies used in response to negative thoughts and feelings.<sup>12</sup> Participants are asked to  
47 rate the degree to which they have engaged in a particular coping strategy or thought  
48 process during the previous week. Responses are scaled from 0%-100% and are summed  
49 to produce a total score. Higher scores indicate greater conviction in metacognitive beliefs  
50 and greater use of maladaptive coping strategies to manage distress. The CAS-1R has  
51 demonstrated good psychometric properties in physical health populations.<sup>17</sup>  
52  
53  
54  
55  
56

### 57 **Recruitment**

58  
59 After discharge from ICU, patients will be screened by local study teams against inclusion and  
60 exclusion criteria prior to enrolment, with the possibility for enrolment up to 12 months after

1  
2  
3 ICU discharge. Patients will be invited to participate in person whilst awaiting discharge from  
4 hospital, whilst attending an ICU follow up clinic appointment in hospital, or by postal invitation  
5 with a unique code to offer the opportunity to complete the consent form. Questionnaires at 3,  
6 6 and/or 12 months will be completed online, by phone or by post.  
7  
8  
9

## 10 Database

11 Study data will be collected and managed using the online Research Electronic Data Capture  
12 (REDCap) system hosted at the University of Liverpool.<sup>18 19</sup> Personal data will be added to the  
13 secure, web-based software platform only once patients agree to participate in the study and  
14 will be held for the study duration. Personal patient data will be pseudo-anonymised for  
15 analysis and will be held in compliance with EU General Data Protection Regulations (GDPR)  
16 and the UK Data Protection Act (2018).  
17  
18  
19  
20  
21  
22

## 23 Patient and Public Involvement

24 The peer support group charity, ICUsteps, has a group of ex-ICU patients and relatives who  
25 feed back on the importance and relevance of the research question and how they view the  
26 outcome measures being used. One of the authors in her role as the research manager for  
27 ICUsteps asked this group to comment on the draft research protocol using their experience  
28 of critical illness. They were also asked to comment on the possible impact for patients of  
29 taking part in the study. Patients were not involved in the recruitment to or conduct of the  
30 study.  
31  
32  
33  
34  
35  
36  
37

## 38 ANCILLARY STUDIES

39 Three sub-studies were designed and added to the main study, following HRA approval on 28  
40 February 2022. Semi-structured interviews were added to the study to gain a deeper  
41 understanding of patient experience, taking into consideration feedback from patients involved  
42 in the study that the validated tools utilised in the questionnaire did not allow the nuance of  
43 their individual experiences to be conveyed. Surveying sites to understand the services  
44 available to COVID-19 survivors across the country was added to gain context to the  
45 information provided in the questionnaires in regards to whether patients engaged with follow  
46 up services. As PIM-COVID is a trainee-led study, we added a survey of team members to  
47 understand the attitudes and opinions of collaborators and to gain their feedback on the study  
48 in a structured way.  
49  
50  
51  
52  
53  
54  
55  
56

## 57 Sub-study: Semi-structured Interviews

58 The aim of the semi-structured interviews is to explore the experiences of critical care  
59 survivors following COVID-19 infection during their recovery phase, including perceptions  
60

1  
2  
3 about the care received and support available to them. Study participants who have indicated  
4 on a completed questionnaire that they are happy to be contacted by the study team for more  
5 information will be approached by telephone or email to discuss their potential participation in  
6 a one-on-one interview. A purposive sample of participants will be selected aiming for a  
7 sample that is diverse, representative of the cohort (in terms of ethnicity, sex, geographical  
8 location, degree of deprivation based on postcode, length of stay in ICU, etc), and inclusive of  
9 participants with and without evidence of psychological distress, based on answers to the 3  
10 and 6 month questionnaires, where these have been answered. Participants from the last  
11 cohort of patients discharged from ICU will be invited to interview. Interviews will be conducted  
12 via Microsoft Teams or by phone and will be recorded. Audio recordings will be transcribed  
13 for analysis by a transcription service.  
14  
15  
16  
17  
18  
19  
20  
21

### 22 **Sub-study: Survey of study team members**

23 We aim to explore factors influencing study team member involvement, understand their  
24 attitudes and opinions, and gain feedback on the study. Team members at all study sites will  
25 be invited to complete an online survey by email, which will explore the socio-demographic  
26 characteristics of study team members, previous academic experience, feedback on  
27 involvement in the study, attitudes towards health research, barriers and motivators to  
28 contributing to health research, and future research plans.  
29  
30  
31  
32  
33  
34

### 35 **Sub-study: Survey of study sites**

36 Current national guidelines state that at-risk ICU survivors who have had an admission of  
37 more than 4 days should be invited to a follow up clinic 2-3 months after discharge from ICU.<sup>20</sup>  
38 However, hospital and community based services to support ICU survivors in their recovery  
39 were limited even before COVID-19, with about 70% of hospitals not offering an ICU follow up  
40 clinic.<sup>21</sup> In this sub-study we aim to assess geographical differences in the availability and  
41 structure of follow-up services offered to patients with critical COVID-19 after hospital  
42 discharge. All intensive care units within the UK will be approached by email and/or phone  
43 and invited to complete an online survey about follow-up services available for patients having  
44 been discharged from hospital after critical illness.  
45  
46  
47  
48  
49  
50  
51

## 52 **STATISTICAL METHODS**

53 We will report findings of the study using descriptive methods in the absence of a non-COVID  
54 or non-ICU comparator group. Data about ICU patients in the United Kingdom were reported  
55 by the Intensive Care National Audit and Research Centre (ICNARC) in three temporal groups  
56 related to the 'waves' of ICU patients admitted with COVID-19. In keeping with the date ranges  
57 used by ICNARC, we will consider study participants who were in ICU prior to 31 August 2020,  
58  
59  
60

1  
2  
3 between 1 September 2020 and 30 April 2021, and from 1 May 2021 onwards in addition to  
4 evaluating the overall cohort.<sup>22</sup>  
5  
6  
7

### 8 *Multiple cohorts design*

9 Unadjusted point prevalence rates per 100,000 individuals will be estimated with 95%  
10 Confidence Intervals at 3-, 6- and 12-month observations. These separate cohorts cannot be  
11 directly compared because ICU and broader illness-related variables may change over time  
12 and thus may differ between cohorts (e.g., survivor bias attributable to improved ICU care  
13 during the course of the pandemic). Clinical risk factors for each cohort will be estimated  
14 using binomial logistic regression.  
15  
16  
17  
18  
19

### 20 *Single cohort design*

21 Separate analyses will be conducted with HADS Anxiety, Depression and IES-6 scores.  
22 Trajectories of HADS Anxiety, Depression and IES-6 scores will be described using growth  
23 curve analysis. Growth curve analysis is a flexible statistical method for describing population  
24 changes over multiple timepoints by flexibly fitting and comparing pre-specified linear or  
25 curvilinear models. Risk factors can be identified by fitting predictors to models, allowing for  
26 both intra- and inter-participant variations to be analysed.<sup>23-25</sup> To improve power, we will use  
27 the full range of scores for the HADS and IES-6.  
28  
29  
30  
31  
32  
33

34 Latent growth curve modelling (LGCM) is a form of structural equation modelling that allows  
35 a population's trajectory across multiple observations to be described with regard to two  
36 parameters; an intercept representing the population mean at time=0, and a slope  
37 representing sequential changes from that mean.<sup>25</sup> In LGCM pre-specified theoretical models  
38 can be tested for adequacy of fit to the data, or parameters can be freely estimated. As the  
39 intercept and slope parameters cannot be fully specified in advance for model testing, we will  
40 adopt a conventional approach of testing and refining a model of the data starting from an  
41 initial fully constrained model. Constraints are systematically relaxed based on fit to the  
42 emerging model until good fit is established. Once intercept and slope of each model are  
43 identified, putative demographic, clinical, physical and/or psychosocial risk factors can be  
44 identified using multivariate analyses, such as regression, to predict intercept and slope.  
45  
46  
47  
48  
49  
50  
51  
52  
53

54 The initial model will specify known population means for HADS anxiety and depression and  
55 IES-6 as intercepts, a linear slope trajectory, with homogenous individual growth, equality of  
56 error variance across observations and independence of slope and error estimates assumed.  
57 These are initial assumptions in the process of latent growth curve modelling and are outside  
58 the scope of this manuscript but are explained in the reference provided here.<sup>23</sup> Parameters  
59  
60

1  
2  
3 will be relaxed in that order until good fitting models (Comparative Fix Index (CFI) > .95, Root  
4 Mean Square Error of Approximation (RMSEA) .05) are identified whilst retaining as many  
5 fixed parameters from the initial model as possible.<sup>26 27</sup> Linear and quadratic slope models  
6 will be tested; linear models being defined as slope parameters 0, 1, 4, and 12 and quadratic  
7 slopes as 0, 1, 8 and 24.  
8  
9  
10

11  
12 Secondary analyses will be to assess temporal relationships between HADS Anxiety,  
13 Depression and IES-6 scores and CAS-1R and EQ-5D-5L variables to identify the roles of the  
14 latter as potential mediators of the former.  
15  
16

### 17 18 19 *Missing Data*

20 Missing variable replacement will not be used in the multiple cohorts design. Data replacement  
21 for the single cohort design will be achieved by multiple imputation for the logistic regression  
22 analysis and unbiased full information maximum likelihood estimation. Some missing variables  
23 in the single cohort will derive from the death of participants – the date of death will be provided  
24 by study teams into the online study database if the patient has died during the study period.  
25 Data will not be replaced in observations missed through death, but data obtained from these  
26 participants whilst alive will be used in imputation calculations.<sup>28</sup>  
27  
28  
29  
30  
31  
32

### 33 34 *Sub-study: Semi-structured Interviews*

35 Analysis of the interviews will use the principles of the constant comparative method and  
36 interpretive thematic analysis. The analysis will be interpretive and consider both latent and  
37 manifest aspects of the data, thereby acknowledging both the manner that participants talk as  
38 well as the explicit content. Analysis will progress in parallel with recruitment and will end when  
39 theoretical saturation is reached. Systematic data coding will be performed; exceptional case  
40 analysis will be discussed within the research team; and data will be triangulated with  
41 quantitative data from the PIM-COVID study to enriching findings and interpretation.  
42  
43  
44  
45  
46

### 47 48 *Sub-studies: Survey of Study Team Members & Survey of Study Sites*

49 The findings of both surveys will be reported using descriptive methods.  
50  
51  
52  
53  
54  
55  
56  
57  
58  
59  
60

## RESEARCH ETHICS APPROVAL

The study was approved by the Health Research Authority (East Midlands - Derby Research and Ethics Committee, reference: 20/EM/0247).

## DATA SHARING STATEMENT

Upon the conclusion of the study, the dataset may be made available from the corresponding author on reasonable request.

## AUTHOR CONTRIBUTIONS

AW, BW and AB conceived the study. The protocol was developed with the expertise of MGC, PF, SB and CJ in clinical psychological research, and CJ has advocated for patients and has represented their perspective. SB created the plan for statistical analysis. AW, MGC and IW received funding to conduct this study. AW, IW and KW have key roles in study implementation. AW wrote the first draft of this protocol. All authors refined the study protocol and approved this manuscript.

## COMPETING INTERESTS

None of the authors have any competing interests that may have influenced the submitted work.

## FUNDING

Funding is provided through by the Intensive Care Society (ICS) Young Investigators Award. This covers the postage, costs of using the HADS questionnaire, statistical analysis, and publication costs. Additional charitable funding was provided by the Mersey School of Anaesthesia (MSA) upon application. Neither the ICS as the primary funding source or the MSA had a role in the design of this study and nor will either have any role during its execution, analyses, interpretation of the data, or in the decision to submit results.



**REFERENCES**

1. Stam HJ, Stucki G, Bickenbach J. Covid-19 and Post Intensive Care Syndrome: A Call for Action. *J Rehabil Med* 2020;52(4):jrm00044. doi: 10.2340/16501977-2677 [published Online First: 2020/04/15]
2. Bienvenu OJ, Friedman LA, Colantuoni E, et al. Psychiatric symptoms after acute respiratory distress syndrome: a 5-year longitudinal study. *Intensive Care Med* 2018;44(1):38-47. doi: 10.1007/s00134-017-5009-4 [published Online First: 2017/12/28]
3. Ahmed H, Patel K, Greenwood DC, et al. Long-term clinical outcomes in survivors of severe acute respiratory syndrome and Middle East respiratory syndrome coronavirus outbreaks after hospitalisation or ICU admission: A systematic review and meta-analysis. *J Rehabil Med* 2020;52(5):jrm00063. doi: 10.2340/16501977-2694 [published Online First: 2020/05/26]
4. Needham DM, Davidson J, Cohen H, et al. Improving long-term outcomes after discharge from intensive care unit: report from a stakeholders' conference. *Crit Care Med* 2012;40(2):502-9. doi: 10.1097/CCM.0b013e318232da75 [published Online First: 2011/09/29]
5. Nikayin S, Rabiee A, Hashem MD, et al. Anxiety symptoms in survivors of critical illness: a systematic review and meta-analysis. *Gen Hosp Psychiatry* 2016;43:23-29. doi: 10.1016/j.genhosppsy.2016.08.005 [published Online First: 2016/11/01]
6. Rabiee A, Nikayin S, Hashem MD, et al. Depressive Symptoms After Critical Illness: A Systematic Review and Meta-Analysis. *Crit Care Med* 2016;44(9):1744-53. doi: 10.1097/ccm.0000000000001811 [published Online First: 2016/05/07]
7. Parker AM, Sricharoenchai T, Raparla S, et al. Posttraumatic stress disorder in critical illness survivors: a metaanalysis. *Crit Care Med* 2015;43(5):1121-9. doi: 10.1097/ccm.0000000000000882 [published Online First: 2015/02/06]
8. Chua SE, Cheung V, McAlonan GM, et al. Stress and psychological impact on SARS patients during the outbreak. *Can J Psychiatry* 2004;49(6):385-90. doi: 10.1177/070674370404900607 [published Online First: 2004/07/31]
9. Lee AM, Wong JG, McAlonan GM, et al. Stress and psychological distress among SARS survivors 1 year after the outbreak. *Can J Psychiatry* 2007;52(4):233-40. doi: 10.1177/070674370705200405 [published Online First: 2007/05/16]
10. Mak IW, Chu CM, Pan PC, et al. Long-term psychiatric morbidities among SARS survivors. *Gen Hosp Psychiatry* 2009;31(4):318-26. doi: 10.1016/j.genhosppsy.2009.03.001 [published Online First: 2009/06/27]



- 1  
2  
3 11. Jones C, Bäckman C, Capuzzo M, et al. Precipitants of post-traumatic stress disorder  
4 following intensive care: a hypothesis generating study of diversity in care. *Intensive*  
5 *Care Med* 2007;33(6):978-85. doi: 10.1007/s00134-007-0600-8 [published Online  
6 First: 2007/03/27]  
7
- 8  
9 12. Wells A. *Metacognitive Therapy for Anxiety and Depression*. London: Guilford Press  
10 2009.  
11
- 12 13. Jutte JE, Needham DM, Pfoh ER, et al. Psychometric evaluation of the Hospital Anxiety  
13 and Depression Scale 3 months after acute lung injury. *J Crit Care* 2015;30(4):793-8.  
14 doi: 10.1016/j.jcrc.2015.04.006 [published Online First: 2015/05/20]  
15
- 16 14. Bjelland I, Dahl AA, Haug TT, et al. The validity of the Hospital Anxiety and Depression  
17 Scale. An updated literature review. *J Psychosom Res* 2002;52(2):69-77. doi:  
18 10.1016/s0022-3999(01)00296-3 [published Online First: 2002/02/08]  
19
- 20 15. Hosey MM, Leoutsakos JS, Li X, et al. Screening for posttraumatic stress disorder in  
21 ARDS survivors: validation of the Impact of Event Scale-6 (IES-6). *Crit Care*  
22 2019;23(1):276. doi: 10.1186/s13054-019-2553-z [published Online First:  
23 2019/08/09]  
24
- 25 16. Needham DM, Sepulveda KA, Dinglas VD, et al. Core Outcome Measures for Clinical  
26 Research in Acute Respiratory Failure Survivors. An International Modified Delphi  
27 Consensus Study. *Am J Respir Crit Care Med* 2017;196(9):1122-30. doi:  
28 10.1164/rccm.201702-0372OC [published Online First: 2017/05/26]  
29
- 30 17. Faija CL, Reeves D, Heal C, et al. Measuring the Cognitive Attentional Syndrome in  
31 Cardiac Patients With Anxiety and Depression Symptoms: Psychometric Properties  
32 of the CAS-1R. *Front Psychol* 2019;10:2109. doi: 10.3389/fpsyg.2019.02109  
33 [published Online First: 2019/10/18]  
34
- 35 18. Harris PA, Taylor R, Minor BL, et al. The REDCap consortium: Building an international  
36 community of software platform partners. *J Biomed Inform* 2019;95:103208. doi:  
37 10.1016/j.jbi.2019.103208 [published Online First: 2019/05/13]  
38
- 39 19. Harris PA, Taylor R, Thielke R, et al. Research electronic data capture (REDCap)--a  
40 metadata-driven methodology and workflow process for providing translational  
41 research informatics support. *J Biomed Inform* 2009;42(2):377-81. doi:  
42 10.1016/j.jbi.2008.08.010 [published Online First: 2008/10/22]  
43
- 44 20. National Institute for Health and Care Excellence. Rehabilitation after critical illness in  
45 adults. Clinical guideline 83 (CG83): NICE; 2009 [Available from:  
46 <https://www.nice.org.uk/guidance/cg83> accessed 01 June 2021].  
47
- 48 21. Connolly B, Douiri A, Steier J, et al. A UK survey of rehabilitation following critical illness:  
49 implementation of NICE Clinical Guidance 83 (CG83) following hospital discharge.  
50  
51  
52  
53  
54  
55  
56  
57  
58  
59  
60

- 1  
2  
3 *BMJ Open* 2014;4(5):e004963. doi: 10.1136/bmjopen-2014-004963 [published  
4 Online First: 2014/05/17]  
5  
6 22. : Intensive Care National Audit & Research Centre; [Available from:  
7 <https://www.icnarc.org/Our-Audit/Audits/Cmp/Reports> accessed 20 November 2022.  
8  
9 23. Burant CJ. Latent Growth Curve Models: Tracking Changes Over Time. *Int J Aging Hum*  
10 *Dev* 2016;82(4):336-50. doi: 10.1177/0091415016641692 [published Online First:  
11 2016/04/15]  
12  
13 24. Curran PJ, Obeidat K, Losardo D. Twelve Frequently Asked Questions About Growth  
14 Curve Modeling. *J Cogn Dev* 2010;11(2):121-36. doi: 10.1080/15248371003699969  
15 [published Online First: 2010/01/01]  
16  
17 25. Berlin KS, Parra GR, Williams NA. An introduction to latent variable mixture modeling  
18 (part 2): longitudinal latent class growth analysis and growth mixture models. *J*  
19 *Pediatr Psychol* 2014;39(2):188-203. doi: 10.1093/jpepsy/jst085 [published Online  
20 First: 2013/11/28]  
21  
22 26. Hu Lt, Bentler PM. Cutoff criteria for fit indexes in covariance structure analysis:  
23 Conventional criteria versus new alternatives. *Structural Equation Modeling: A*  
24 *Multidisciplinary Journal* 1999;6(1):1-55. doi: 10.1080/10705519909540118  
25  
26 27. Marsh HW, Hau K-T, Wen Z. In Search of Golden Rules: Comment on Hypothesis-  
27 Testing Approaches to Setting Cutoff Values for Fit Indexes and Dangers in  
28 Overgeneralizing Hu and Bentler's (1999) Findings. *Structural Equation Modeling: A*  
29 *Multidisciplinary Journal* 2004;11(3):320-41. doi: 10.1207/s15328007sem1103\_2  
30  
31 28. Wen L, Terrera GM, Seaman SR. Methods for handling longitudinal outcome processes  
32 truncated by dropout and death. *Biostatistics* 2018;19(4):407-25. doi:  
33 10.1093/biostatistics/kxx045 [published Online First: 2017/10/14]  
34  
35  
36  
37  
38  
39  
40  
41  
42  
43  
44  
45  
46  
47  
48  
49  
50  
51  
52  
53  
54  
55  
56  
57  
58  
59  
60

## LICENCE STATEMENT

Alicia Waite, the Submitting Author has the right to grant and does grant on behalf of all authors of the Work (as defined in the below author licence), an exclusive licence and/or a non-exclusive licence for contributions from authors who are: i) UK Crown employees; ii) where BMJ has agreed a CC-BY licence shall apply, and/or iii) in accordance with the terms applicable for US Federal Government officers or employees acting as part of their official duties; on a worldwide, perpetual, irrevocable, royalty-free basis to BMJ Publishing Group Ltd ("BMJ") its licensees and where the relevant Journal is co-owned by BMJ to the co-owners of the Journal, to publish the Work in BMJ Open and any other BMJ products and to exploit all rights, as set out in our licence.

The Submitting Author accepts and understands that any supply made under these terms is made by BMJ to the Submitting Author unless you are acting as an employee on behalf of your employer or a postgraduate student of an affiliated institution which is paying any applicable article publishing charge ("APC") for Open Access articles. Where the Submitting Author wishes to make the Work available on an Open Access basis (and intends to pay the relevant APC), the terms of reuse of such Open Access shall be governed by a Creative Commons licence – details of these licences and which Creative Commons licence will apply to this Work are set out in our licence referred to above.

# Reporting checklist for protocol of a clinical trial.

Based on the SPIRIT guidelines.

## Instructions to authors

Complete this checklist by entering the page numbers from your manuscript where readers will find each of the items listed below.

Your article may not currently address all the items on the checklist. Please modify your text to include the missing information. If you are certain that an item does not apply, please write "n/a" and provide a short explanation.

Upload your completed checklist as an extra file when you submit to a journal.

In your methods section, say that you used the SPIRIT reporting guidelines, and cite them as:

Chan A-W, Tetzlaff JM, Gøtzsche PC, Altman DG, Mann H, Berlin J, Dickersin K, Hróbjartsson A, Schulz KF, Parulekar WR, Krleža-Jerić K, Laupacis A, Moher D. SPIRIT 2013 Explanation and Elaboration: Guidance for protocols of clinical trials. *BMJ*. 2013;346:e7586

|                                             |                     | Reporting Item                                                                                               | Page Number |
|---------------------------------------------|---------------------|--------------------------------------------------------------------------------------------------------------|-------------|
| <b>Administrative information</b>           |                     |                                                                                                              |             |
| Title                                       | <a href="#">#1</a>  | Descriptive title identifying the study design, population, interventions, and, if applicable, trial acronym | 1           |
| Trial registration                          | <a href="#">#2a</a> | Trial identifier and registry name. If not yet registered, name of intended registry                         | 1           |
| Trial registration: data set                | <a href="#">#2b</a> | All items from the World Health Organization Trial Registration Data Set                                     | N/A         |
| Protocol version                            | <a href="#">#3</a>  | Date and version identifier                                                                                  | 1           |
| Funding                                     | <a href="#">#4</a>  | Sources and types of financial, material, and other support                                                  | 2           |
| Roles and responsibilities: contributorship | <a href="#">#5a</a> | Names, affiliations, and roles of protocol contributors                                                      | 2           |

|    |                           |                     |                                                                      |     |
|----|---------------------------|---------------------|----------------------------------------------------------------------|-----|
| 1  | Roles and                 | <a href="#">#5b</a> | Name and contact information for the trial sponsor                   | 2   |
| 2  | responsibilities:         |                     |                                                                      |     |
| 3  | sponsor contact           |                     |                                                                      |     |
| 4  | information               |                     |                                                                      |     |
| 5  |                           |                     |                                                                      |     |
| 6  |                           |                     |                                                                      |     |
| 7  |                           |                     |                                                                      |     |
| 8  | Roles and                 | <a href="#">#5c</a> | Role of study sponsor and funders, if any, in study design;          | 2   |
| 9  | responsibilities:         |                     | collection, management, analysis, and interpretation of data;        |     |
| 10 | sponsor and funder        |                     | writing of the report; and the decision to submit the report for     |     |
| 11 |                           |                     | publication, including whether they will have ultimate authority     |     |
| 12 |                           |                     | over any of these activities                                         |     |
| 13 |                           |                     |                                                                      |     |
| 14 |                           |                     |                                                                      |     |
| 15 |                           |                     |                                                                      |     |
| 16 | Roles and                 | <a href="#">#5d</a> | Composition, roles, and responsibilities of the coordinating centre, | N/A |
| 17 | responsibilities:         |                     | steering committee, endpoint adjudication committee, data            |     |
| 18 | committees                |                     | management team, and other individuals or groups overseeing the      |     |
| 19 |                           |                     | trial, if applicable (see Item 21a for data monitoring committee)    |     |
| 20 |                           |                     |                                                                      |     |
| 21 |                           |                     |                                                                      |     |
| 22 |                           |                     |                                                                      |     |
| 23 | <b>Introduction</b>       |                     |                                                                      |     |
| 24 |                           |                     |                                                                      |     |
| 25 | Background and            | <a href="#">#6a</a> | Description of research question and justification for undertaking   | 4   |
| 26 | rationale                 |                     | the trial, including summary of relevant studies (published and      |     |
| 27 |                           |                     | unpublished) examining benefits and harms for each intervention      |     |
| 28 |                           |                     |                                                                      |     |
| 29 |                           |                     |                                                                      |     |
| 30 | Background and            | <a href="#">#6b</a> | Explanation for choice of comparators                                | N/A |
| 31 | rationale: choice of      |                     |                                                                      |     |
| 32 | comparators               |                     |                                                                      |     |
| 33 |                           |                     |                                                                      |     |
| 34 |                           |                     |                                                                      |     |
| 35 |                           |                     |                                                                      |     |
| 36 | Objectives                | <a href="#">#7</a>  | Specific objectives or hypotheses                                    | 4   |
| 37 |                           |                     |                                                                      |     |
| 38 | Trial design              | <a href="#">#8</a>  | Description of trial design including type of trial (eg, parallel    | 5   |
| 39 |                           |                     | group, crossover, factorial, single group), allocation ratio, and    |     |
| 40 |                           |                     | framework (eg, superiority, equivalence, non-inferiority,            |     |
| 41 |                           |                     | exploratory)                                                         |     |
| 42 |                           |                     |                                                                      |     |
| 43 |                           |                     |                                                                      |     |
| 44 |                           |                     |                                                                      |     |
| 45 | <b>Methods:</b>           |                     |                                                                      |     |
| 46 | <b>Participants,</b>      |                     |                                                                      |     |
| 47 | <b>interventions, and</b> |                     |                                                                      |     |
| 48 | <b>outcomes</b>           |                     |                                                                      |     |
| 49 |                           |                     |                                                                      |     |
| 50 |                           |                     |                                                                      |     |
| 51 | Study setting             | <a href="#">#9</a>  | Description of study settings (eg, community clinic, academic        | 5   |
| 52 |                           |                     | hospital) and list of countries where data will be collected.        |     |
| 53 |                           |                     | Reference to where list of study sites can be obtained               |     |
| 54 |                           |                     |                                                                      |     |
| 55 |                           |                     |                                                                      |     |
| 56 |                           |                     |                                                                      |     |
| 57 | Eligibility criteria      | <a href="#">#10</a> | Inclusion and exclusion criteria for participants. If applicable,    | 12  |
| 58 |                           |                     | eligibility criteria for study centres and individuals who will      |     |
| 59 |                           |                     |                                                                      |     |
| 60 |                           |                     |                                                                      |     |

|    |                              |                                                                                            |     |
|----|------------------------------|--------------------------------------------------------------------------------------------|-----|
|    |                              | perform the interventions (eg, surgeons, psychotherapists)                                 |     |
| 1  |                              |                                                                                            |     |
| 2  | Interventions:               | <a href="#">#11a</a> Interventions for each group with sufficient detail to allow          | N/A |
| 3  | description                  | replication, including how and when they will be administered                              |     |
| 4  |                              |                                                                                            |     |
| 5  | Interventions:               | <a href="#">#11b</a> Criteria for discontinuing or modifying allocated interventions for a | N/A |
| 6  | modifications                | given trial participant (eg, drug dose change in response to harms,                        |     |
| 7  |                              | participant request, or improving / worsening disease)                                     |     |
| 8  |                              |                                                                                            |     |
| 9  | Interventions:               | <a href="#">#11c</a> Strategies to improve adherence to intervention protocols, and any    | N/A |
| 10 | adherence                    | procedures for monitoring adherence (eg, drug tablet return;                               |     |
| 11 |                              | laboratory tests)                                                                          |     |
| 12 | Interventions:               | <a href="#">#11d</a> Relevant concomitant care and interventions that are permitted or     | N/A |
| 13 | concomitant care             | prohibited during the trial                                                                |     |
| 14 |                              |                                                                                            |     |
| 15 | Outcomes                     | <a href="#">#12</a> Primary, secondary, and other outcomes, including the specific         | 5   |
| 16 |                              | measurement variable (eg, systolic blood pressure), analysis metric                        |     |
| 17 |                              | (eg, change from baseline, final value, time to event), method of                          |     |
| 18 |                              | aggregation (eg, median, proportion), and time point for each                              |     |
| 19 |                              | outcome. Explanation of the clinical relevance of chosen efficacy                          |     |
| 20 |                              | and harm outcomes is strongly recommended                                                  |     |
| 21 | Participant timeline         | <a href="#">#13</a> Time schedule of enrolment, interventions (including any run-ins       | 5   |
| 22 |                              | and washouts), assessments, and visits for participants. A                                 |     |
| 23 |                              | schematic diagram is highly recommended (see Figure)                                       |     |
| 24 |                              |                                                                                            |     |
| 25 | Sample size                  | <a href="#">#14</a> Estimated number of participants needed to achieve study               | N/A |
| 26 |                              | objectives and how it was determined, including clinical and                               |     |
| 27 |                              | statistical assumptions supporting any sample size calculations                            |     |
| 28 |                              |                                                                                            |     |
| 29 | Recruitment                  | <a href="#">#15</a> Strategies for achieving adequate participant enrolment to reach       | 5   |
| 30 |                              | target sample size                                                                         |     |
| 31 |                              |                                                                                            |     |
| 32 |                              |                                                                                            |     |
| 33 |                              |                                                                                            |     |
| 34 |                              |                                                                                            |     |
| 35 |                              |                                                                                            |     |
| 36 |                              |                                                                                            |     |
| 37 |                              |                                                                                            |     |
| 38 |                              |                                                                                            |     |
| 39 |                              |                                                                                            |     |
| 40 |                              |                                                                                            |     |
| 41 |                              |                                                                                            |     |
| 42 |                              |                                                                                            |     |
| 43 |                              |                                                                                            |     |
| 44 |                              |                                                                                            |     |
| 45 | <b>Methods: Assignment</b>   |                                                                                            |     |
| 46 | <b>of interventions (for</b> |                                                                                            |     |
| 47 | <b>controlled trials)</b>    |                                                                                            |     |
| 48 |                              |                                                                                            |     |
| 49 |                              |                                                                                            |     |
| 50 | Allocation: sequence         | <a href="#">#16a</a> Method of generating the allocation sequence (eg, computer-           | N/A |
| 51 | generation                   | generated random numbers), and list of any factors for                                     |     |
| 52 |                              | stratification. To reduce predictability of a random sequence,                             |     |
| 53 |                              | details of any planned restriction (eg, blocking) should be provided                       |     |
| 54 |                              | in a separate document that is unavailable to those who enrol                              |     |
| 55 |                              | participants or assign interventions                                                       |     |
| 56 |                              |                                                                                            |     |
| 57 |                              |                                                                                            |     |
| 58 |                              |                                                                                            |     |
| 59 |                              |                                                                                            |     |
| 60 |                              |                                                                                            |     |

|    |                        |                      |                                                                                                                                                                                                                                                                                                                                                                                                              |     |
|----|------------------------|----------------------|--------------------------------------------------------------------------------------------------------------------------------------------------------------------------------------------------------------------------------------------------------------------------------------------------------------------------------------------------------------------------------------------------------------|-----|
| 1  | Allocation concealment | <a href="#">#16b</a> | Mechanism of implementing the allocation sequence (eg, central telephone; sequentially numbered, opaque, sealed envelopes), describing any steps to conceal the sequence until interventions are assigned                                                                                                                                                                                                    | N/A |
| 2  | mechanism              |                      |                                                                                                                                                                                                                                                                                                                                                                                                              |     |
| 3  |                        |                      |                                                                                                                                                                                                                                                                                                                                                                                                              |     |
| 4  |                        |                      |                                                                                                                                                                                                                                                                                                                                                                                                              |     |
| 5  |                        |                      |                                                                                                                                                                                                                                                                                                                                                                                                              |     |
| 6  |                        |                      |                                                                                                                                                                                                                                                                                                                                                                                                              |     |
| 7  |                        |                      |                                                                                                                                                                                                                                                                                                                                                                                                              |     |
| 8  | Allocation:            | <a href="#">#16c</a> | Who will generate the allocation sequence, who will enrol participants, and who will assign participants to interventions                                                                                                                                                                                                                                                                                    | N/A |
| 9  | implementation         |                      |                                                                                                                                                                                                                                                                                                                                                                                                              |     |
| 10 |                        |                      |                                                                                                                                                                                                                                                                                                                                                                                                              |     |
| 11 | Blinding (masking)     | <a href="#">#17a</a> | Who will be blinded after assignment to interventions (eg, trial participants, care providers, outcome assessors, data analysts), and how                                                                                                                                                                                                                                                                    | N/A |
| 12 |                        |                      |                                                                                                                                                                                                                                                                                                                                                                                                              |     |
| 13 |                        |                      |                                                                                                                                                                                                                                                                                                                                                                                                              |     |
| 14 |                        |                      |                                                                                                                                                                                                                                                                                                                                                                                                              |     |
| 15 |                        |                      |                                                                                                                                                                                                                                                                                                                                                                                                              |     |
| 16 |                        |                      |                                                                                                                                                                                                                                                                                                                                                                                                              |     |
| 17 | Blinding (masking):    | <a href="#">#17b</a> | If blinded, circumstances under which unblinding is permissible, and procedure for revealing a participant's allocated intervention during the trial                                                                                                                                                                                                                                                         | N/A |
| 18 | emergency unblinding   |                      |                                                                                                                                                                                                                                                                                                                                                                                                              |     |
| 19 |                        |                      |                                                                                                                                                                                                                                                                                                                                                                                                              |     |
| 20 |                        |                      |                                                                                                                                                                                                                                                                                                                                                                                                              |     |
| 21 |                        |                      |                                                                                                                                                                                                                                                                                                                                                                                                              |     |
| 22 | <b>Methods: Data</b>   |                      |                                                                                                                                                                                                                                                                                                                                                                                                              |     |
| 23 | <b>collection,</b>     |                      |                                                                                                                                                                                                                                                                                                                                                                                                              |     |
| 24 | <b>management, and</b> |                      |                                                                                                                                                                                                                                                                                                                                                                                                              |     |
| 25 | <b>analysis</b>        |                      |                                                                                                                                                                                                                                                                                                                                                                                                              |     |
| 26 |                        |                      |                                                                                                                                                                                                                                                                                                                                                                                                              |     |
| 27 |                        |                      |                                                                                                                                                                                                                                                                                                                                                                                                              |     |
| 28 |                        |                      |                                                                                                                                                                                                                                                                                                                                                                                                              |     |
| 29 | Data collection plan   | <a href="#">#18a</a> | Plans for assessment and collection of outcome, baseline, and other trial data, including any related processes to promote data quality (eg, duplicate measurements, training of assessors) and a description of study instruments (eg, questionnaires, laboratory tests) along with their reliability and validity, if known. Reference to where data collection forms can be found, if not in the protocol | 7   |
| 30 |                        |                      |                                                                                                                                                                                                                                                                                                                                                                                                              |     |
| 31 |                        |                      |                                                                                                                                                                                                                                                                                                                                                                                                              |     |
| 32 |                        |                      |                                                                                                                                                                                                                                                                                                                                                                                                              |     |
| 33 |                        |                      |                                                                                                                                                                                                                                                                                                                                                                                                              |     |
| 34 |                        |                      |                                                                                                                                                                                                                                                                                                                                                                                                              |     |
| 35 |                        |                      |                                                                                                                                                                                                                                                                                                                                                                                                              |     |
| 36 |                        |                      |                                                                                                                                                                                                                                                                                                                                                                                                              |     |
| 37 |                        |                      |                                                                                                                                                                                                                                                                                                                                                                                                              |     |
| 38 |                        |                      |                                                                                                                                                                                                                                                                                                                                                                                                              |     |
| 39 | Data collection plan:  | <a href="#">#18b</a> | Plans to promote participant retention and complete follow-up, including list of any outcome data to be collected for participants who discontinue or deviate from intervention protocols                                                                                                                                                                                                                    | N/A |
| 40 | retention              |                      |                                                                                                                                                                                                                                                                                                                                                                                                              |     |
| 41 |                        |                      |                                                                                                                                                                                                                                                                                                                                                                                                              |     |
| 42 |                        |                      |                                                                                                                                                                                                                                                                                                                                                                                                              |     |
| 43 |                        |                      |                                                                                                                                                                                                                                                                                                                                                                                                              |     |
| 44 | Data management        | <a href="#">#19</a>  | Plans for data entry, coding, security, and storage, including any related processes to promote data quality (eg, double data entry; range checks for data values). Reference to where details of data management procedures can be found, if not in the protocol                                                                                                                                            | 7   |
| 45 |                        |                      |                                                                                                                                                                                                                                                                                                                                                                                                              |     |
| 46 |                        |                      |                                                                                                                                                                                                                                                                                                                                                                                                              |     |
| 47 |                        |                      |                                                                                                                                                                                                                                                                                                                                                                                                              |     |
| 48 |                        |                      |                                                                                                                                                                                                                                                                                                                                                                                                              |     |
| 49 |                        |                      |                                                                                                                                                                                                                                                                                                                                                                                                              |     |
| 50 |                        |                      |                                                                                                                                                                                                                                                                                                                                                                                                              |     |
| 51 | Statistics: outcomes   | <a href="#">#20a</a> | Statistical methods for analysing primary and secondary outcomes. Reference to where other details of the statistical analysis plan can be found, if not in the protocol                                                                                                                                                                                                                                     | 9   |
| 52 |                        |                      |                                                                                                                                                                                                                                                                                                                                                                                                              |     |
| 53 |                        |                      |                                                                                                                                                                                                                                                                                                                                                                                                              |     |
| 54 |                        |                      |                                                                                                                                                                                                                                                                                                                                                                                                              |     |
| 55 |                        |                      |                                                                                                                                                                                                                                                                                                                                                                                                              |     |
| 56 | Statistics: additional | <a href="#">#20b</a> | Methods for any additional analyses (eg, subgroup and adjusted analyses)                                                                                                                                                                                                                                                                                                                                     | 10  |
| 57 | analyses               |                      |                                                                                                                                                                                                                                                                                                                                                                                                              |     |
| 58 |                        |                      |                                                                                                                                                                                                                                                                                                                                                                                                              |     |
| 59 |                        |                      |                                                                                                                                                                                                                                                                                                                                                                                                              |     |
| 60 |                        |                      |                                                                                                                                                                                                                                                                                                                                                                                                              |     |



|    |                            |                      |                                                                         |     |
|----|----------------------------|----------------------|-------------------------------------------------------------------------|-----|
| 1  | Statistics: analysis       | <a href="#">#20c</a> | Definition of analysis population relating to protocol non-             | 10  |
| 2  | population and missing     |                      | adherence (eg, as randomised analysis), and any statistical methods     |     |
| 3  | data                       |                      | to handle missing data (eg, multiple imputation)                        |     |
| 4  |                            |                      |                                                                         |     |
| 5  |                            |                      |                                                                         |     |
| 6  | <b>Methods: Monitoring</b> |                      |                                                                         |     |
| 7  |                            |                      |                                                                         |     |
| 8  |                            |                      |                                                                         |     |
| 9  | Data monitoring:           | <a href="#">#21a</a> | Composition of data monitoring committee (DMC); summary of its          | N/A |
| 10 | formal committee           |                      | role and reporting structure; statement of whether it is independent    |     |
| 11 |                            |                      | from the sponsor and competing interests; and reference to where        |     |
| 12 |                            |                      | further details about its charter can be found, if not in the protocol. |     |
| 13 |                            |                      | Alternatively, an explanation of why a DMC is not needed                |     |
| 14 |                            |                      |                                                                         |     |
| 15 |                            |                      |                                                                         |     |
| 16 |                            |                      |                                                                         |     |
| 17 | Data monitoring:           | <a href="#">#21b</a> | Description of any interim analyses and stopping guidelines,            | N/A |
| 18 | interim analysis           |                      | including who will have access to these interim results and make        |     |
| 19 |                            |                      | the final decision to terminate the trial                               |     |
| 20 |                            |                      |                                                                         |     |
| 21 |                            |                      |                                                                         |     |
| 22 | Harms                      | <a href="#">#22</a>  | Plans for collecting, assessing, reporting, and managing solicited      | N/A |
| 23 |                            |                      | and spontaneously reported adverse events and other unintended          |     |
| 24 |                            |                      | effects of trial interventions or trial conduct                         |     |
| 25 |                            |                      |                                                                         |     |
| 26 |                            |                      |                                                                         |     |
| 27 |                            |                      |                                                                         |     |
| 28 | Auditing                   | <a href="#">#23</a>  | Frequency and procedures for auditing trial conduct, if any, and        | N/A |
| 29 |                            |                      | whether the process will be independent from investigators and the      |     |
| 30 |                            |                      | sponsor                                                                 |     |
| 31 |                            |                      |                                                                         |     |
| 32 |                            |                      |                                                                         |     |
| 33 | <b>Ethics and</b>          |                      |                                                                         |     |
| 34 | <b>dissemination</b>       |                      |                                                                         |     |
| 35 |                            |                      |                                                                         |     |
| 36 |                            |                      |                                                                         |     |
| 37 | Research ethics            | <a href="#">#24</a>  | Plans for seeking research ethics committee / institutional review      | 11  |
| 38 | approval                   |                      | board (REC / IRB) approval                                              |     |
| 39 |                            |                      |                                                                         |     |
| 40 |                            |                      |                                                                         |     |
| 41 | Protocol amendments        | <a href="#">#25</a>  | Plans for communicating important protocol modifications (eg,           | N/A |
| 42 |                            |                      | changes to eligibility criteria, outcomes, analyses) to relevant        |     |
| 43 |                            |                      | parties (eg, investigators, REC / IRBs, trial participants, trial       |     |
| 44 |                            |                      | registries, journals, regulators)                                       |     |
| 45 |                            |                      |                                                                         |     |
| 46 |                            |                      |                                                                         |     |
| 47 | Consent or assent          | <a href="#">#26a</a> | Who will obtain informed consent or assent from potential trial         | 7   |
| 48 |                            |                      | participants or authorised surrogates, and how (see Item 32)            |     |
| 49 |                            |                      |                                                                         |     |
| 50 |                            |                      |                                                                         |     |
| 51 | Consent or assent:         | <a href="#">#26b</a> | Additional consent provisions for collection and use of participant     | 8   |
| 52 | ancillary studies          |                      | data and biological specimens in ancillary studies, if applicable       |     |
| 53 |                            |                      |                                                                         |     |
| 54 |                            |                      |                                                                         |     |
| 55 | Confidentiality            | <a href="#">#27</a>  | How personal information about potential and enrolled participants      | 7   |
| 56 |                            |                      | will be collected, shared, and maintained in order to protect           |     |
| 57 |                            |                      | confidentiality before, during, and after the trial                     |     |
| 58 |                            |                      |                                                                         |     |
| 59 |                            |                      |                                                                         |     |
| 60 |                            |                      |                                                                         |     |



|    |                                             |                      |                                                                                                                                                                                                                                                                                     |     |
|----|---------------------------------------------|----------------------|-------------------------------------------------------------------------------------------------------------------------------------------------------------------------------------------------------------------------------------------------------------------------------------|-----|
| 1  | Declaration of interests                    | <a href="#">#28</a>  | Financial and other competing interests for principal investigators for the overall trial and each study site                                                                                                                                                                       | 11  |
| 2  |                                             |                      |                                                                                                                                                                                                                                                                                     |     |
| 3  |                                             |                      |                                                                                                                                                                                                                                                                                     |     |
| 4  | Data access                                 | <a href="#">#29</a>  | Statement of who will have access to the final trial dataset, and disclosure of contractual agreements that limit such access for investigators                                                                                                                                     | 11  |
| 5  |                                             |                      |                                                                                                                                                                                                                                                                                     |     |
| 6  |                                             |                      |                                                                                                                                                                                                                                                                                     |     |
| 7  |                                             |                      |                                                                                                                                                                                                                                                                                     |     |
| 8  |                                             |                      |                                                                                                                                                                                                                                                                                     |     |
| 9  |                                             |                      |                                                                                                                                                                                                                                                                                     |     |
| 10 | Ancillary and post trial care               | <a href="#">#30</a>  | Provisions, if any, for ancillary and post-trial care, and for compensation to those who suffer harm from trial participation                                                                                                                                                       | N/A |
| 11 |                                             |                      |                                                                                                                                                                                                                                                                                     |     |
| 12 |                                             |                      |                                                                                                                                                                                                                                                                                     |     |
| 13 |                                             |                      |                                                                                                                                                                                                                                                                                     |     |
| 14 | Dissemination policy: trial results         | <a href="#">#31a</a> | Plans for investigators and sponsor to communicate trial results to participants, healthcare professionals, the public, and other relevant groups (eg, via publication, reporting in results databases, or other data sharing arrangements), including any publication restrictions | N/A |
| 15 |                                             |                      |                                                                                                                                                                                                                                                                                     |     |
| 16 |                                             |                      |                                                                                                                                                                                                                                                                                     |     |
| 17 |                                             |                      |                                                                                                                                                                                                                                                                                     |     |
| 18 |                                             |                      |                                                                                                                                                                                                                                                                                     |     |
| 19 |                                             |                      |                                                                                                                                                                                                                                                                                     |     |
| 20 |                                             |                      |                                                                                                                                                                                                                                                                                     |     |
| 21 | Dissemination policy: authorship            | <a href="#">#31b</a> | Authorship eligibility guidelines and any intended use of professional writers                                                                                                                                                                                                      | N/A |
| 22 |                                             |                      |                                                                                                                                                                                                                                                                                     |     |
| 23 |                                             |                      |                                                                                                                                                                                                                                                                                     |     |
| 24 | Dissemination policy: reproducible research | <a href="#">#31c</a> | Plans, if any, for granting public access to the full protocol, participant-level dataset, and statistical code                                                                                                                                                                     | 11  |
| 25 |                                             |                      |                                                                                                                                                                                                                                                                                     |     |
| 26 |                                             |                      |                                                                                                                                                                                                                                                                                     |     |
| 27 |                                             |                      |                                                                                                                                                                                                                                                                                     |     |
| 28 | <b>Appendices</b>                           |                      |                                                                                                                                                                                                                                                                                     |     |
| 29 |                                             |                      |                                                                                                                                                                                                                                                                                     |     |
| 30 |                                             |                      |                                                                                                                                                                                                                                                                                     |     |
| 31 | Informed consent materials                  | <a href="#">#32</a>  | Model consent form and other related documentation given to participants and authorised surrogates                                                                                                                                                                                  | N/A |
| 32 |                                             |                      |                                                                                                                                                                                                                                                                                     |     |
| 33 |                                             |                      |                                                                                                                                                                                                                                                                                     |     |
| 34 | Biological specimens                        | <a href="#">#33</a>  | Plans for collection, laboratory evaluation, and storage of biological specimens for genetic or molecular analysis in the current trial and for future use in ancillary studies, if applicable                                                                                      | N/A |
| 35 |                                             |                      |                                                                                                                                                                                                                                                                                     |     |
| 36 |                                             |                      |                                                                                                                                                                                                                                                                                     |     |
| 37 |                                             |                      |                                                                                                                                                                                                                                                                                     |     |
| 38 |                                             |                      |                                                                                                                                                                                                                                                                                     |     |
| 39 |                                             |                      |                                                                                                                                                                                                                                                                                     |     |

40 The SPIRIT Explanation and Elaboration paper is distributed under the terms of the Creative Commons  
 41 Attribution License CC-BY-NC. This checklist was completed on 08. January 2023 using  
 42 <https://www.goodreports.org/>, a tool made by the [EQUATOR Network](#) in collaboration with [Penelope.ai](#)  
 43  
 44  
 45  
 46  
 47  
 48  
 49  
 50  
 51  
 52  
 53  
 54  
 55  
 56  
 57  
 58  
 59

# BMJ Open

## **PIM-COVID study: protocol for a multi-centre, longitudinal study measuring the psychological impact of surviving an intensive care admission due to COVID-19 on patients in the United Kingdom**

|                                 |                                                                                                                                                                                                                                                                                                                                                                                                                                                                                                                                                                                                                                                                                                                                                                                                                                                                                                                                                                                                                                                     |
|---------------------------------|-----------------------------------------------------------------------------------------------------------------------------------------------------------------------------------------------------------------------------------------------------------------------------------------------------------------------------------------------------------------------------------------------------------------------------------------------------------------------------------------------------------------------------------------------------------------------------------------------------------------------------------------------------------------------------------------------------------------------------------------------------------------------------------------------------------------------------------------------------------------------------------------------------------------------------------------------------------------------------------------------------------------------------------------------------|
| Journal:                        | <i>BMJ Open</i>                                                                                                                                                                                                                                                                                                                                                                                                                                                                                                                                                                                                                                                                                                                                                                                                                                                                                                                                                                                                                                     |
| Manuscript ID                   | bmjopen-2023-071730.R1                                                                                                                                                                                                                                                                                                                                                                                                                                                                                                                                                                                                                                                                                                                                                                                                                                                                                                                                                                                                                              |
| Article Type:                   | Protocol                                                                                                                                                                                                                                                                                                                                                                                                                                                                                                                                                                                                                                                                                                                                                                                                                                                                                                                                                                                                                                            |
| Date Submitted by the Author:   | 03-May-2023                                                                                                                                                                                                                                                                                                                                                                                                                                                                                                                                                                                                                                                                                                                                                                                                                                                                                                                                                                                                                                         |
| Complete List of Authors:       | Waite, Alicia; Royal Liverpool University Hospital, Critical Care; University of Liverpool, Institute of Life Course and Medical Sciences<br>Johnston, Brian; Royal Liverpool University Hospital, Critical Care; University of Liverpool, Institute of Life Course and Medical Sciences<br>Boyle, Andrew; Royal Victoria Hospital, Regional Intensive Care Unit<br>Cherry, M. Gemma; University of Liverpool, Department of Primary Care and Mental Health, Institute of Population Health<br>Fisher, Peter; University of Liverpool, Department of Primary Care and Mental Health, Institute of Population Health<br>Brown, Stephen; University of New England, School of Psychology; University of Liverpool, Department of Primary Care and Mental Health, Institute of Population Health<br>Jones, Christina; ICusteps<br>Williams, Karen; Royal Liverpool University Hospital, Critical Care<br>Welters, Ingeborg; University of Liverpool, Institute of Life Course and Medical Sciences; Royal Liverpool University Hospital, Critical Care |
| <b>Primary Subject Heading</b>: | Intensive care                                                                                                                                                                                                                                                                                                                                                                                                                                                                                                                                                                                                                                                                                                                                                                                                                                                                                                                                                                                                                                      |
| Secondary Subject Heading:      | Mental health                                                                                                                                                                                                                                                                                                                                                                                                                                                                                                                                                                                                                                                                                                                                                                                                                                                                                                                                                                                                                                       |
| Keywords:                       | Anxiety disorders < PSYCHIATRY, Depression & mood disorders < PSYCHIATRY, COVID-19, Quality of Life, Adult intensive & critical care < INTENSIVE & CRITICAL CARE                                                                                                                                                                                                                                                                                                                                                                                                                                                                                                                                                                                                                                                                                                                                                                                                                                                                                    |
|                                 |                                                                                                                                                                                                                                                                                                                                                                                                                                                                                                                                                                                                                                                                                                                                                                                                                                                                                                                                                                                                                                                     |

SCHOLARONE™  
Manuscripts

**Title:**

PIM-COVID study: protocol for a multi-centre, longitudinal study measuring the psychological impact of surviving an intensive care admission due to COVID-19 on patients in the United Kingdom

**Study Acronym:**

PIM-COVID

**Registries:**

IRAS: 282400

CPMS: 47545

Clinicaltrials.gov: NCT05092529

**Issue date:**

15 March 2021

**Protocol version:**

1.6

**Authors:**

Alicia A C Waite<sup>1,2\*</sup>; Brian W Johnston<sup>1, 2</sup>; Andrew J Boyle<sup>3</sup>; Mary Gemma Cherry<sup>4</sup>; Peter Fisher<sup>4</sup>; Stephen Brown<sup>4,6</sup>; Christina Jones<sup>5</sup>; Karen Williams<sup>1</sup>; Ingeborg D Welters<sup>1\*, 2</sup>

<sup>1</sup> Intensive Care Unit, Royal Liverpool University Hospital, UK

<sup>2</sup> Institute of Life Course and Medical Sciences, University of Liverpool, UK

<sup>3</sup> Regional Intensive Care Unit, Royal Victoria Hospital, Belfast, UK

<sup>4</sup> Department of Primary Care and Mental Health, Institute of Population Health, University of Liverpool, UK

<sup>5</sup> ICUsteps Charity, Kemp House, 152 City Road, London, UK

<sup>6</sup> School of Psychology, University of New England, Australia

\* Honorary appointment

**Corresponding Author:**

Alicia A C Waite

[alicia.waite@liverpool.ac.uk](mailto:alicia.waite@liverpool.ac.uk)

Intensive Care Unit, Royal Liverpool University Hospital, Prescot Street, Liverpool, L7 8XP

**Study Manager:**

Karen Williams

Word count: 3528

**Keywords:**

Anxiety, Depression, COVID-19, Post intensive care syndrome (PICS), Quality of life, Trauma

**Study Sponsor:**

Liverpool University Hospitals NHS Foundation Trust

**Sponsor's Reference:** SP0316

**Contact name:** Mrs Heather Rogers

**Address:** Research Development and Innovation, Royal Liverpool University Hospital, Liverpool, L7 8XP

**Telephone:** +44 (0)151 705 3754

**Email:** heather.rogers@liverpoolft.nhs.uk

## ABSTRACT

### Introduction

Psychological distress is common in intensive care unit (ICU) survivors and is anticipated in those who were treated for severe COVID-19 infection. This trainee-led, multi-centre, observational, longitudinal study aims to assess the psychological outcomes of ICU survivors treated for COVID-19 infection in the United Kingdom at 3, 6 and/or 12 months after ICU discharge and explore whether there are demographic, psychosocial and clinical risk factors for psychological distress.

### Methods and analysis

Questionnaires will be provided to study participants 3, 6 and/or 12 months after discharge from intensive care, assessing for anxiety, depression, post-traumatic stress symptoms, health-related quality of life and physical symptoms. Demographic, psychosocial and clinical data will also be collected to explore risk factors for psychological distress using latent growth curve modelling. Study participants will be eligible to complete questionnaires at any of the three timepoints online, by telephone or by post.

### Ethics

The PIM-COVID study was approved by the Health Research Authority (East Midlands - Derby Research and Ethics Committee, reference: 20/EM/0247).

### Trial registration number

NCT05092529; Pre-results

## ARTICLE SUMMARY

### Strengths and Limitations

1. Trainee-led, multi-centre, longitudinal, observational study assessing the psychological outcomes in ICU survivors with COVID-19 in the United Kingdom
2. Outcomes are assessed at multiple time points after ICU discharge, allowing an assessment of the trajectory of patient symptoms
3. Findings will be enriched by the inclusion of qualitative data from patient interviews, a survey of team members and an evaluation of available follow-up services.
4. Participants are eligible to join the study at any point up to 12 months post ICU discharge, which improves the temporal scope of the sampling but may lead to variation in response rates at the 3, 6 and 12 month timepoints.

## BACKGROUND

Coronavirus disease 2019 (COVID-19) has led to an extraordinary demand for intensive care support for patients severely affected by SARS-CoV-2. There is an anticipated psychological impact of these intensive care admissions<sup>1</sup> based on previous evidence from intensive care unit (ICU) survivors with acute respiratory distress syndrome (ARDS)[1 2] and from patients treated during previous coronavirus pandemics, namely Severe Acute Respiratory Syndrome (SARS) in 2002-2003 and Middle East Respiratory Syndrome (MERS) in 2012-2013.[3] Evidence is emerging on the impact of COVID-19 on hospitalised patients in the UK and internationally.[4-7] We anticipate that the PIM-COVID study will be the largest longitudinal, observational study in the UK to assess the psychological outcomes of critically ill patients who have been treated for COVID-19 infection.

Psychological symptoms after an ICU admission may form part of Post Intensive Care Syndrome (PICS), which can also include cognitive and physical impairments that are new or have worsened following ICU admission and persist on discharge from hospital.[8] In a study assessing the psychological wellbeing of ICU survivors up to five years after discharge from hospital, up to 38% of ICU patients diagnosed with non-COVID-19 ARDS were found to have prolonged symptoms of anxiety, depression and post-traumatic stress disorder (PTSD), with a median duration of symptoms between 33 and 39 months.[2] Admission to critical care is itself associated with a significant burden of psychological sequelae. Symptoms of anxiety, depression and PTSD have been reported to affect up to 73% of ICU survivors.[9-11] Furthermore, symptoms of anxiety, depression and PTSD can persist in up to 34% of ICU survivors after one year following critical care admission.[9-11] At the peak of the SARS outbreak, patients reported significantly higher stress levels than healthy controls,[12] with 64% of patients reporting symptoms suggesting psychiatric morbidity at 12 months.[13] Recognised risk factors for emotional distress following ICU admission include previous psychiatric morbidity, receipt of benzodiazepines in ICU, physical restraint and psychiatric symptoms during their admission.[9-11 14 15] Data are conflicting regarding the influence of sex on risk for experiencing psychological distress and developing long-term psychiatric morbidity after an ICU admission.[9-11 13 16] Data from previous pandemics suggests that pandemic-related factors such as quarantine may also have an impact on the psychological wellbeing of ICU survivors.[3]

### Study Aims and Objectives

In this study, we aim to assess the short- and long-term psychological impact on patients who have survived an admission to intensive care due to COVID-19 in the United Kingdom, and

1  
2  
3 identify possible predictors of anxiety, depression and post-traumatic stress symptoms in this  
4 patient group. This is the first intensive care trainee-led multi-centre study to be conducted in  
5 the United Kingdom, facilitated by the Trainee in Intensive Care (TRIC) Network and with  
6 support from the National Institute of Health Research (NIHR). The TRIC Network is a UK-  
7 wide group of trainees, with an interest in intensive care medicine, who aim to facilitate and  
8 inspire audit, quality improvement and research among trainees (interns/residents) and ICU-  
9 affiliated clinicians.  
10  
11  
12  
13  
14

15  
16 Our primary objective of the study is to identify the proportion of patients surviving an  
17 admission to intensive care due to COVID-19 who experience anxiety, depression and/or post-  
18 traumatic stress symptoms at 6 months post-discharge, assessed using the Hospital Anxiety  
19 and Depression Scale (HADS) and the Impact of Event Scale-6 (IES-6), respectively.  
20 Secondary objectives are to identify demographic, clinical, physical and/or psychosocial risk  
21 factors for depression, anxiety and/or post-traumatic stress symptoms at 3, 6 and 12 months  
22 post discharge from ICU and to assess the feasibility of using a self-reported online  
23 questionnaire to examine psychological distress in patients following ICU admission.  
24  
25  
26  
27  
28  
29

## 30 **METHODS AND ANALYSIS**

### 31 **Study Protocol**

#### 32 **Study Design and Setting**

33 PIM-COVID is a multicentre, longitudinal study involving intensive care units in National Health  
34 Service (NHS) hospitals in England, Northern Ireland, Scotland and Wales. Study participants  
35 have been invited to participate after discharge from intensive care, following assessment of  
36 inclusion and exclusion criteria (see Table 1). The study started in November 2020 and is due  
37 to be completed, inclusive of the sub-studies, in November 2023.  
38  
39  
40  
41  
42  
43  
44  
45  
46  
47  
48  
49  
50  
51  
52  
53  
54  
55  
56  
57  
58  
59  
60

**Table 1: PIM-COVID Study Eligibility Criteria**

| Inclusion Criteria                                                                                    | Exclusion Criteria                                                                                                                     |
|-------------------------------------------------------------------------------------------------------|----------------------------------------------------------------------------------------------------------------------------------------|
| Adult patients aged $\geq 18$ years                                                                   | Unable or unwilling to consent                                                                                                         |
| Diagnosed positive for COVID-19                                                                       | Unable to complete questionnaires                                                                                                      |
| Survived to intensive care / high dependency unit discharge following an admission of $\geq 24$ hours | Unable to speak, understand or communicate in English                                                                                  |
|                                                                                                       | Patients with diagnosed pre-existing cognitive impairment (at the time of ICU admission)                                               |
|                                                                                                       | Patients with no fixed abode, at which postal questionnaire might be not received, and who have no access to a personal email address. |

The study has two related components:

(1) A multiple cohorts design will be used for point prevalence estimates. We are seeking to obtain a large sample spanning a long time period. Thus, patients meeting the inclusion criteria will be approached up to 12 months post ICU discharge, with some entering the study at 3, 6 and 12 month timepoints. Separate prevalence estimates will be made for each follow-up, with risk factor analysis from clinical data at each timepoint.

(2) A nested single cohort design will provide longitudinal analysis. Using patients available at the 3- and 12-month timepoints, we will estimate individual changes over time and conduct a longitudinal analysis of risk factors.

#### Study Outcomes

The primary outcome of the study is the prevalence of anxiety, depression and post-traumatic stress symptoms in ICU survivors who have been treated for COVID-19 infection. Anxiety and depression will be assessed using the HADS. Post-traumatic stress symptoms will be assessed using the IES-6. Exploratory outcomes will use demographic, clinical and physical data (outlined in Table 2) to identify demographic, clinical, physical and/or psychosocial predictors of depression, anxiety and/or post-traumatic stress symptoms at 3, 6 and 12 months after discharge from ICU. Evaluation of psychosocial predictors will use metacognitive beliefs and processes (thoughts about beliefs and thought processes) and these will be assessed using the Cognitive Attentional Syndrome Scale-1 (Revised).[17] The feasibility of using a



self-reported online questionnaire to assess anxiety, depression and post-traumatic stress symptoms in patients following ICU admission will be evaluated using recruitment numbers, recruitment rate (proportion of those deemed eligible recruited), retention rate (proportion of participants who provide data at subsequent data capture points), and rate of missing key data.

**Table 2: Data collected in the PIM-COVID study**

|                                                                                                                 |                                                                                                                                                                                                                                                                                                                                                                                                                                                                                                                                                               |
|-----------------------------------------------------------------------------------------------------------------|---------------------------------------------------------------------------------------------------------------------------------------------------------------------------------------------------------------------------------------------------------------------------------------------------------------------------------------------------------------------------------------------------------------------------------------------------------------------------------------------------------------------------------------------------------------|
| Demographic Data                                                                                                | Age<br>Sex<br>Highest education level obtained<br>Employment status<br>Socioeconomic status (postcode-linked deprivation index)                                                                                                                                                                                                                                                                                                                                                                                                                               |
| Clinical Data                                                                                                   | Length of stay in ICU<br>Laboratory diagnosis or suspicion of COVID-19 infection<br>Mental health co-morbidities pre-admission (self-reported and as documented in medical records)<br>Physical health co-morbidities pre-admission<br>Acute Physiologic Assessment and Chronic Health Evaluation (APACHE) II score †<br>Ventilatory support during ICU admission<br>Diagnosis of delirium during ICU admission<br>Benzodiazepine requirement during ICU admission (other than as required for intubation)<br>Date of death (if during 12 month study period) |
| Functional Data                                                                                                 | EuroQol 5-dimension, 5-level questionnaire * (EQ-5D-5L, assessing health-related quality of life. Used as a subjective assessment of the physical function of participants)                                                                                                                                                                                                                                                                                                                                                                                   |
| Psychological Data                                                                                              | <i>Anxiety:</i> Hospital Anxiety and Depression Scale (HADS)*<br>EQ-5D-5L*<br><i>Depression:</i> Hospital Anxiety and Depression Scale (HADS)*<br>EQ-5D-5L*<br><i>Psychological trauma symptoms:</i> Impact of Event Scale-6 (IES-6)*                                                                                                                                                                                                                                                                                                                         |
| Metacognitive beliefs and processes                                                                             | Cognitive Attentional Syndrome Scale-1 Revised (CAS-1R) *                                                                                                                                                                                                                                                                                                                                                                                                                                                                                                     |
| * <i>Self-reported questionnaires administered at 3, 6 and/or 12 months following ICU discharge</i>             |                                                                                                                                                                                                                                                                                                                                                                                                                                                                                                                                                               |
| † <i>The APACHE II score is an ICU illness severity scoring applied within the first 24 hours of admission.</i> |                                                                                                                                                                                                                                                                                                                                                                                                                                                                                                                                                               |

### *Hospital and Anxiety Depression Scale (HADS)*

The HADS is a 14-item self-report measure in which participants rate the presence of symptoms of anxiety (7 items) and depression (7 items) over the preceding week using a 4-point Likert scale, with options from 0 (absence) to 3 (extreme presence). Responses are summed to produce two subscale scores, ranging from 0-21, with higher scores indicative of higher anxiety and depression levels, respectively. The HADS is widely used to assess anxiety and depression in people with physical health difficulties and demonstrates good psychometric properties when used in an intensive care setting.[18] Cut-off scores of  $\geq 8$  on anxiety and depression subscales of the HADS have been used to define caseness, with a score of 8-10 being 'borderline abnormal' and a score of 11-21 indicating anxiety or depression.[18 19]

### *Impact of Event Scale-6 (IES-6)*

The IES-6 is a validated tool in survivors of ARDS to screen for post-traumatic stress disorder. It is an abbreviated version of the Impact of Event Scale-Revised (IES-R) test and contains six questions.[20] We selected the IES-6 over the IES-R because it is shorter, has been validated in a very similar patient population,[20] will provide similar information to the IES-R, and is likely to have a higher completion rate by patients because of its length in the context of participants commonly experiencing a reduced concentration span following ICU admission.[8] Each of the six items in IES-6 is marked on a scale of 0-4, where zero indicates absence of distress and four indicates extreme distress. The mean of the six items is then calculated to give the IES-6 score. Cut-off scores of  $\geq 1.75$  indicate probable symptoms of PTSD in survivors of ARDS.[20]

### *EuroQol 5-dimension, 5-level questionnaire (EQ-5D-5L)*

The EQ-5D-5L is a five-domain, self-report measure assessing mobility, self-care, usual activities, pain/discomfort and anxiety/depression. Participants are asked to rate each question, indicating no problems, slight problems, moderate problems, severe problems or extreme problems. In addition, participants are invited to rate their health on a visual analogue scale from 0-100, where zero represents the worst health imaginable and 100 represents the best health imaginable. EQ-5D-5L is the recommended questionnaire to assess the health-related quality of life of critically ill patients.[21] Whilst we will report all domains of the EQ-5D-5L, the HADS will be used to assess rates of anxiety and depression.

### *Cognitive Attentional Syndrome Scale-1 Revised (CAS-1R)*

The CAS-1R is a 10-item self-report measure assessing positive and negative metacognitive beliefs, frequency of worry or rumination and the use of a range of counterproductive coping

1  
2  
3 strategies used in response to negative thoughts and feelings.[17] Participants are asked to  
4 rate the degree to which they have engaged in a particular coping strategy or thought process  
5 during the previous week. Responses are scaled from 0%-100% and are summed to produce  
6 a total score. Higher scores indicate greater conviction in metacognitive beliefs and greater  
7 use of maladaptive coping strategies to manage distress. The CAS-1R has demonstrated  
8 good psychometric properties in physical health populations.[22]  
9  
10  
11  
12

### 13 14 Recruitment

15 After discharge from ICU, patients will be screened by local study teams against inclusion and  
16 exclusion criteria prior to enrolment, with the possibility for enrolment up to 12 months after  
17 ICU discharge. Patients will be invited to participate in person whilst awaiting discharge from  
18 hospital, whilst attending an ICU follow up clinic appointment in hospital, or by postal invitation  
19 with a unique code to offer the opportunity to complete the consent form. Questionnaires at 3,  
20 6 and/or 12 months will be completed online, by phone or by post.  
21  
22  
23  
24  
25

### 26 Database

27 Study data will be collected and managed using the online Research Electronic Data Capture  
28 (REDCap) system hosted at the University of Liverpool.[23 24] Personal data will be added to  
29 the secure, web-based software platform only once patients agree to participate in the study  
30 and will be held for the study duration. Personal patient data will be pseudo-anonymised for  
31 analysis and will be held in compliance with EU General Data Protection Regulations (GDPR)  
32 and the UK Data Protection Act (2018).  
33  
34  
35  
36  
37  
38  
39

### 40 Patient and Public Involvement

41 The peer support group charity, ICUsteps, has a group of ex-ICU patients and relatives who  
42 feed back on the importance and relevance of the research question and how they view the  
43 outcome measures being used. One of the authors in her role as the research manager for  
44 ICUsteps asked this group to comment on the draft research protocol using their experience  
45 of critical illness. They were also asked to comment on the possible impact for patients of  
46 taking part in the study. Patients were not involved in the recruitment to or conduct of the  
47 study.  
48  
49  
50  
51  
52

### 53 ANCILLARY STUDIES

54 Three sub-studies were designed and added to the main study, following HRA approval on 28  
55 February 2022. Semi-structured interviews were added to the study to gain a deeper  
56 understanding of patient experience, taking into consideration feedback from patients involved  
57 in the study that the validated tools utilised in the questionnaire did not allow the nuance of  
58  
59  
60

1  
2  
3 their individual experiences to be conveyed. Surveying sites to understand the services  
4 available to COVID-19 survivors across the country was added to gain context to the  
5 information provided in the questionnaires in regards to whether patients engaged with follow  
6 up services. As PIM-COVID is a trainee-led study, we added a survey of team members to  
7 understand the attitudes and opinions of collaborators and to gain their feedback on the study  
8 in a structured way.  
9  
10  
11  
12

### 13 14 **Sub-study: Semi-structured Interviews**

15 The aim of the semi-structured interviews is to explore the experiences of critical care  
16 survivors following COVID-19 infection during their recovery phase, including perceptions  
17 about the care received and support available to them. The structure of the interview is  
18 outlined in the 'Interview Guide', which can be found in the supplementary material. Study  
19 participants who have indicated on a completed questionnaire that they are happy to be  
20 contacted by the study team for more information will be approached by telephone or email to  
21 discuss their potential participation in a one-on-one interview. A purposive sample of  
22 participants will be selected aiming for a sample that is diverse, representative of the cohort  
23 (in terms of ethnicity, sex, geographical location, degree of deprivation based on postcode,[25-  
24 28] length of stay in ICU, etc), and inclusive of participants with and without evidence of  
25 psychological distress, based on answers to the 3 and 6 month questionnaires, where these  
26 have been answered. Participants from the last cohort of patients discharged from ICU will be  
27 invited to interview. Interviews will be conducted via Microsoft Teams or by phone and will be  
28 recorded. Audio recordings will be transcribed for analysis by a transcription service.  
29  
30  
31  
32  
33  
34  
35  
36  
37  
38

### 39 **Sub-study: Survey of study team members**

40 We aim to explore factors influencing study team member involvement, understand their  
41 attitudes and opinions, and gain feedback on the study. Team members at all study sites will  
42 be invited to complete an online survey by email, which will explore the socio-demographic  
43 characteristics of study team members, previous academic experience, feedback on  
44 involvement in the study, attitudes towards health research, barriers and motivators to  
45 contributing to health research, and future research plans.  
46  
47  
48  
49  
50  
51

### 52 **Sub-study: Survey of study sites**

53 Current national guidelines state that at-risk ICU survivors who have had an admission of  
54 more than 4 days should be invited to a follow up clinic 2-3 months after discharge from  
55 ICU.[29] However, hospital and community based services to support ICU survivors in their  
56 recovery were limited even before COVID-19, with about 70% of hospitals not offering an ICU  
57 follow up clinic.[30] In this sub-study we aim to assess geographical differences in the  
58  
59  
60

1  
2  
3 availability and structure of follow-up services offered to patients with critical COVID-19 after  
4 hospital discharge. All intensive care units within the UK will be approached by email and/or  
5 phone and invited to complete an online survey about follow-up services available for patients  
6 having been discharged from hospital after critical illness.  
7  
8  
9

## 10 **STATISTICAL METHODS**

11 We will report findings of the study using descriptive methods in the absence of a non-COVID  
12 or non-ICU comparator group. Data about ICU patients in the United Kingdom were reported  
13 by the Intensive Care National Audit and Research Centre (ICNARC) in three temporal groups  
14 related to the 'waves' of ICU patients admitted with COVID-19. In keeping with the date ranges  
15 used by ICNARC, we will consider study participants who were in ICU prior to 31 August 2020,  
16 between 1 September 2020 and 30 April 2021, and from 1 May 2021 onwards in addition to  
17 evaluating the overall cohort.[31] SPSS and MPlus software will be used to conduct statistical  
18 analysis.  
19  
20  
21  
22  
23  
24  
25

### 26 *Multiple cohorts design*

27 The objective is to document 3, 6 and 12-month point prevalence estimates of HADS anxiety  
28 and depression and IES-6 scores, by demographic, clinical, treatment and psychiatric history  
29 variables. Unadjusted point prevalence rates per 100,000 individuals will be estimated with  
30 95% Confidence Intervals at 3-, 6- and 12-month observations. These separate cohorts  
31 cannot be directly compared because ICU and broader illness-related variables may change  
32 over time and thus may differ between cohorts (e.g., survivor bias attributable to improved ICU  
33 care during the course of the pandemic). Demographic, clinical, treatment and psychiatric  
34 history risk factors for each cohort will be estimated using binomial logistic regression.  
35  
36  
37  
38  
39  
40  
41

### 42 *Single cohort design*

43 The objective is to estimate temporal trajectories of HADS anxiety and depression, and IES-  
44 6 scores, and to prospectively predict these trajectories from demographic, clinical, treatment,  
45 psychiatric and CAS-1R scores. Trajectories of HADS Anxiety, Depression and IES-6 scores  
46 will be described using latent growth curve modelling (LGCM). Risk factors can then be  
47 identified by fitting predictors to models, allowing for both intra- and inter-participant variations  
48 to be analysed.[32-34] To improve power, we will use the full range of scores for the HADS  
49 and IES-6, not categories based on putative clinical cutoff scores.  
50  
51  
52  
53  
54  
55

56 LGCM is a form of structural equation modelling that allows a temporal trajectory to be  
57 precisely estimated with regard to two parameters; a slope representing sequential changes  
58 across observations, and an intercept representing the population mean at time=0. In this  
59  
60

1  
2  
3 study, the intercept represents an immediate post-discharge value which will be estimated  
4 from the first (three-month) observation and slope estimates.[34] We will adopt a conventional  
5 approach by modelling HADS anxiety and depression and IES-6 intercepts and slopes,  
6 starting from theoretical assumptions and adjusting these in relation to observed model  
7 parameters until the best compromise between initial parameters and observed data is  
8 achieved. The initial model will use known population means for HADS anxiety and depression  
9 and IES-6 as intercepts, a linear slope trajectory, with homogenous individual growth, equality  
10 of error variance across observations and independence of slope and error estimates  
11 assumed. Linear and quadratic slope models will be specifically tested; linear models being  
12 defined as slope parameters 1, 2, and 4, representing a linear progression between 3, 6 and  
13 12-month observations, and quadratic slopes defined as 1, 4 and 16. Constraints on  
14 parameters will be relaxed until good fitting models (Comparative Fix Index (CFI) > .95, Root  
15 Mean Square Error of Approximation (RMSEA) < .05) are achieved. [35 36] Once intercept  
16 and slope of each model are identified, putative demographic, clinical, physical and/or  
17 psychosocial risk factors can be identified using multivariate analyses, such as regression, to  
18 predict intercept and slope. Secondary analyses will be conducted to assess temporal  
19 relationships between HADS anxiety and depression and IES-6 scores and demographic,  
20 clinical, treatment, psychiatric, CAS-1R and EQ-5D-5L variables to identify the roles of the  
21 latter as potential mediators of the scores.  
22  
23  
24  
25  
26  
27  
28  
29  
30  
31  
32  
33  
34

### 35 *Missing Data*

36 Missing variable replacement will not be used in the multiple cohorts design. Data replacement  
37 for the single cohort design will be achieved by multiple imputation for the logistic regression  
38 analysis and unbiased full information maximum likelihood estimation. Some missing variables  
39 in the single cohort will derive from the death of participants – the date of death will be provided  
40 by study teams into the online study database if the patient has died during the study period.  
41 Data will not be replaced in observations missed through death, but data obtained from these  
42 participants whilst alive will be used in imputation calculations.[37]  
43  
44  
45  
46  
47  
48

### 49 *Sub-study: Semi-structured Interviews*

50 Analysis of the interviews will use the principles of the constant comparative method and  
51 interpretive thematic analysis. The analysis will be interpretive and consider both latent and  
52 manifest aspects of the data, thereby acknowledging both the manner that participants talk as  
53 well as the explicit content. Analysis will progress in parallel with recruitment and will end when  
54 theoretical saturation is reached. Systematic data coding will be performed; exceptional case  
55 analysis will be discussed within the research team; and data will be triangulated with  
56 quantitative data from the PIM-COVID study to enriching findings and interpretation.  
57  
58  
59  
60

1  
2  
3  
4  
5  
6  
7  
8  
9  
10  
11  
12  
13  
14  
15  
16  
17  
18  
19  
20  
21  
22  
23  
24  
25  
26  
27  
28  
29  
30  
31  
32  
33  
34  
35  
36  
37  
38  
39  
40  
41  
42  
43  
44  
45  
46  
47  
48  
49  
50  
51  
52  
53  
54  
55  
56  
57  
58  
59  
60

For peer review only



1  
2  
3 Sub-studies: Survey of Study Team Members & Survey of Study Sites

4 The findings of both surveys will be reported using descriptive methods.  
5  
6

### 7 **RESEARCH ETHICS APPROVAL**

8  
9 The study was approved by the Health Research Authority (East Midlands - Derby Research  
10 and Ethics Committee, reference: 20/EM/0247).  
11  
12

### 13 **DATA SHARING STATEMENT**

14  
15 Upon the conclusion of the study, the dataset may be made available from the corresponding  
16 author on reasonable request.  
17  
18

### 19 **AUTHOR CONTRIBUTIONS**

20  
21 AACW, BWJ and AJB conceived the study. The protocol was developed with the expertise of  
22 MGC, PF, SB and CJ in clinical psychological research, and CJ has advocated for patients  
23 and has represented their perspective. SB created the plan for statistical analysis. AACW,  
24 MGC and IDW received funding to conduct this study. AACW, IDW and KW have key roles in  
25 study implementation. AACW wrote the first draft of this protocol. All authors refined the study  
26 protocol and approved this manuscript.  
27  
28  
29  
30  
31

### 32 **COMPETING INTERESTS**

33  
34 None of the authors have any competing interests that may have influenced the submitted  
35 work.  
36  
37

### 38 **FUNDING**

39  
40 Funding is provided through by the Intensive Care Society (ICS) Young Investigators Award.  
41 This covers the postage, costs of using the HADS questionnaire, statistical analysis, and  
42 publication costs. Additional charitable funding was provided by the Mersey School of  
43 Anaesthesia (MSA) upon application. Neither the ICS as the primary funding source or the  
44 MSA had a role in the design of this study and nor will either have any role during its execution,  
45 analyses, interpretation of the data, or in the decision to submit results.  
46  
47  
48  
49  
50

### 51 **LICENCE STATEMENT**

52  
53 Alicia Waite, the Submitting Author has the right to grant and does grant on behalf of all  
54 authors of the Work (as defined in the below author licence), an exclusive licence and/or a  
55 non-exclusive licence for contributions from authors who are: i) UK Crown employees; ii)  
56 where BMJ has agreed a CC-BY licence shall apply, and/or iii) in accordance with the terms  
57 applicable for US Federal Government officers or employees acting as part of their official  
58  
59  
60



1  
2  
3 duties; on a worldwide, perpetual, irrevocable, royalty-free basis to BMJ Publishing Group Ltd  
4 (“BMJ”) its licensees and where the relevant Journal is co-owned by BMJ to the co-owners of  
5 the Journal, to publish the Work in BMJ Open and any other BMJ products and to exploit all  
6 rights, as set out in our licence.  
7  
8  
9

10  
11 The Submitting Author accepts and understands that any supply made under these terms is  
12 made by BMJ to the Submitting Author unless you are acting as an employee on behalf of  
13 your employer or a postgraduate student of an affiliated institution which is paying any  
14 applicable article publishing charge (“APC”) for Open Access articles. Where the Submitting  
15 Author wishes to make the Work available on an Open Access basis (and intends to pay the  
16 relevant APC), the terms of reuse of such Open Access shall be governed by a Creative  
17 Commons licence – details of these licences and which Creative Commons licence will apply  
18 to this Work are set out in our licence referred to above.  
19  
20  
21  
22  
23

## 24 25 REFERENCES

- 26  
27  
28 1. Stam HJ, Stucki G, Bickenbach J. Covid-19 and Post Intensive Care Syndrome: A Call for  
29 Action. *J Rehabil Med* 2020;52(4):jrm00044. doi: 10.2340/16501977-2677 [published  
30 Online First: 2020/04/15]  
31
- 32  
33 2. Bienvenu OJ, Friedman LA, Colantuoni E, et al. Psychiatric symptoms after acute  
34 respiratory distress syndrome: a 5-year longitudinal study. *Intensive Care Med*  
35 2018;44(1):38-47. doi: 10.1007/s00134-017-5009-4 [published Online First:  
36 2017/12/28]  
37
- 38  
39 3. Ahmed H, Patel K, Greenwood DC, et al. Long-term clinical outcomes in survivors of  
40 severe acute respiratory syndrome and Middle East respiratory syndrome  
41 coronavirus outbreaks after hospitalisation or ICU admission: A systematic review  
42 and meta-analysis. *J Rehabil Med* 2020;52(5):jrm00063. doi: 10.2340/16501977-  
43 2694 [published Online First: 2020/05/26]  
44
- 45  
46 4. Evans RA, McAuley H, Harrison EM, et al. Physical, cognitive, and mental health impacts  
47 of COVID-19 after hospitalisation (PHOSP-COVID): a UK multicentre, prospective  
48 cohort study. *Lancet Respir Med* 2021;9(11):1275-87. doi: 10.1016/s2213-  
49 2600(21)00383-0 [published Online First: 2021/10/11]  
50
- 51  
52 5. Heesakkers H, van der Hoeven JG, Corsten S, et al. Clinical Outcomes Among Patients  
53 With 1-Year Survival Following Intensive Care Unit Treatment for COVID-19. *JAMA*  
54 2022;327(6):559-65. doi: 10.1001/jama.2022.0040 [published Online First:  
55 2022/01/25]  
56  
57  
58  
59  
60

- 1  
2  
3 6. Legrand M, Fong N, Laouénan C, et al. Risk factors of long term symptoms and outcomes  
4 among patients discharged after covid-19: prospective, multicentre observational  
5 study. *BMJ Med* 2022;1(1):e000093. doi: 10.1136/bmjmed-2021-000093 [published  
6 Online First: 2023/03/21]  
7
- 8  
9 7. Gautam N, Madathil S, Tahani N, et al. Medium-Term Outcomes in Severely to Critically  
10 Ill Patients With Severe Acute Respiratory Syndrome Coronavirus 2 Infection. *Clin*  
11 *Infect Dis* 2022;74(2):301-08. doi: 10.1093/cid/ciab341 [published Online First:  
12 2021/04/25]  
13
- 14  
15 8. Needham DM, Davidson J, Cohen H, et al. Improving long-term outcomes after discharge  
16 from intensive care unit: report from a stakeholders' conference. *Crit Care Med*  
17 2012;40(2):502-9. doi: 10.1097/CCM.0b013e318232da75 [published Online First:  
18 2011/09/29]  
19
- 20  
21 9. Nikayin S, Rabiee A, Hashem MD, et al. Anxiety symptoms in survivors of critical illness: a  
22 systematic review and meta-analysis. *Gen Hosp Psychiatry* 2016;43:23-29. doi:  
23 10.1016/j.genhosppsy.2016.08.005 [published Online First: 2016/11/01]  
24
- 25  
26 10. Rabiee A, Nikayin S, Hashem MD, et al. Depressive Symptoms After Critical Illness: A  
27 Systematic Review and Meta-Analysis. *Crit Care Med* 2016;44(9):1744-53. doi:  
28 10.1097/ccm.0000000000001811 [published Online First: 2016/05/07]  
29
- 30  
31 11. Parker AM, Sricharoenchai T, Raparla S, et al. Posttraumatic stress disorder in critical  
32 illness survivors: a metaanalysis. *Crit Care Med* 2015;43(5):1121-9. doi:  
33 10.1097/ccm.0000000000000882 [published Online First: 2015/02/06]  
34
- 35  
36 12. Chua SE, Cheung V, McAlonan GM, et al. Stress and psychological impact on SARS  
37 patients during the outbreak. *Can J Psychiatry* 2004;49(6):385-90. doi:  
38 10.1177/070674370404900607 [published Online First: 2004/07/31]  
39
- 40  
41 13. Lee AM, Wong JG, McAlonan GM, et al. Stress and psychological distress among SARS  
42 survivors 1 year after the outbreak. *Can J Psychiatry* 2007;52(4):233-40. doi:  
43 10.1177/070674370705200405 [published Online First: 2007/05/16]  
44
- 45  
46 14. Jones C, Bäckman C, Capuzzo M, et al. Precipitants of post-traumatic stress disorder  
47 following intensive care: a hypothesis generating study of diversity in care. *Intensive*  
48 *Care Med* 2007;33(6):978-85. doi: 10.1007/s00134-007-0600-8 [published Online  
49 First: 2007/03/27]  
50
- 51  
52 15. Kok L, Slooter AJ, Hillegers MH, et al. Benzodiazepine Use and Neuropsychiatric  
53 Outcomes in the ICU: A Systematic Review. *Crit Care Med* 2018;46(10):1673-80.  
54 doi: 10.1097/ccm.0000000000003300 [published Online First: 2018/07/10]  
55
- 56  
57 16. Mak IW, Chu CM, Pan PC, et al. Long-term psychiatric morbidities among SARS  
58 survivors. *Gen Hosp Psychiatry* 2009;31(4):318-26. doi:  
59 10.1016/j.genhosppsy.2009.03.001 [published Online First: 2009/06/27]  
60

- 1  
2  
3 17. Wells A. Metacognitive Therapy for Anxiety and Depression. London: Guilford Press  
4 2009.
- 5  
6 18. Jutte JE, Needham DM, Pfoh ER, et al. Psychometric evaluation of the Hospital Anxiety  
7 and Depression Scale 3 months after acute lung injury. *J Crit Care* 2015;30(4):793-8.  
8 doi: 10.1016/j.jcrc.2015.04.006 [published Online First: 2015/05/20]  
9
- 10  
11 19. Bjelland I, Dahl AA, Haug TT, et al. The validity of the Hospital Anxiety and Depression  
12 Scale. An updated literature review. *J Psychosom Res* 2002;52(2):69-77. doi:  
13 10.1016/s0022-3999(01)00296-3 [published Online First: 2002/02/08]  
14
- 15  
16 20. Hosey MM, Leoutsakos JS, Li X, et al. Screening for posttraumatic stress disorder in  
17 ARDS survivors: validation of the Impact of Event Scale-6 (IES-6). *Crit Care*  
18 2019;23(1):276. doi: 10.1186/s13054-019-2553-z [published Online First:  
19 2019/08/09]  
20
- 21  
22 21. Needham DM, Sepulveda KA, Dinglas VD, et al. Core Outcome Measures for Clinical  
23 Research in Acute Respiratory Failure Survivors. An International Modified Delphi  
24 Consensus Study. *Am J Respir Crit Care Med* 2017;196(9):1122-30. doi:  
25 10.1164/rccm.201702-0372OC [published Online First: 2017/05/26]  
26
- 27  
28 22. Faija CL, Reeves D, Heal C, et al. Measuring the Cognitive Attentional Syndrome in  
29 Cardiac Patients With Anxiety and Depression Symptoms: Psychometric Properties  
30 of the CAS-1R. *Front Psychol* 2019;10:2109. doi: 10.3389/fpsyg.2019.02109  
31 [published Online First: 2019/10/18]  
32
- 33  
34 23. Harris PA, Taylor R, Minor BL, et al. The REDCap consortium: Building an international  
35 community of software platform partners. *J Biomed Inform* 2019;95:103208. doi:  
36 10.1016/j.jbi.2019.103208 [published Online First: 2019/05/13]  
37
- 38  
39 24. Harris PA, Taylor R, Thielke R, et al. Research electronic data capture (REDCap)--a  
40 metadata-driven methodology and workflow process for providing translational  
41 research informatics support. *J Biomed Inform* 2009;42(2):377-81. doi:  
42 10.1016/j.jbi.2008.08.010 [published Online First: 2008/10/22]  
43
- 44  
45 25. Ministry of Housing CaLG. English indices of deprivation 2019 [updated 26 September  
46 2019. Available from: [https://www.gov.uk/government/statistics/english-indices-of-](https://www.gov.uk/government/statistics/english-indices-of-deprivation-2019)  
47 [deprivation-2019](https://www.gov.uk/government/statistics/english-indices-of-deprivation-2019) accessed 18 April 2023.  
48
- 49  
50 26. Statistics for Wales WG. Welsh Index of Multiple Deprivation (WIMD) 2019 [updated 27  
51 November 2019. Available from: [https://www.gov.wales/welsh-index-multiple-](https://www.gov.wales/welsh-index-multiple-deprivation-index-guidance#section-17160)  
52 [deprivation-index-guidance#section-17160](https://www.gov.wales/welsh-index-multiple-deprivation-index-guidance#section-17160) accessed 18 April 2023.  
53
- 54  
55 27. h-Alba. SGRn. Scottish Index of Multiple Deprivation 2020 [updated 28 January 2020.  
56 Available from: [https://www.gov.scot/collections/scottish-index-of-multiple-](https://www.gov.scot/collections/scottish-index-of-multiple-deprivation-2020/)  
57 [deprivation-2020/](https://www.gov.scot/collections/scottish-index-of-multiple-deprivation-2020/) accessed 18 April 2023.  
58  
59  
60

- 1  
2  
3 28. Northern Ireland Statistics and Research Agency DoF. Northern Ireland Multiple  
4 Deprivation Measure 2017 (NIMDM2017) [updated 23 November 20217. Available  
5 from: [https://www.nisra.gov.uk/statistics/deprivation/northern-ireland-multiple-  
7 deprivation-measure-2017-nimdm2017](https://www.nisra.gov.uk/statistics/deprivation/northern-ireland-multiple-<br/>6 deprivation-measure-2017-nimdm2017) accessed 18 April 2023.
- 8  
9 29. National Institute for Health and Care Excellence. Rehabilitation after critical illness in  
10 adults. Clinical guideline 83 (CG83): NICE; 2009 [Available from:  
11 <https://www.nice.org.uk/guidance/cg83> accessed 01 June 2021.
- 12  
13 30. Connolly B, Douiri A, Steier J, et al. A UK survey of rehabilitation following critical illness:  
14 implementation of NICE Clinical Guidance 83 (CG83) following hospital discharge.  
15 *BMJ Open* 2014;4(5):e004963. doi: 10.1136/bmjopen-2014-004963 [published  
16 Online First: 2014/05/17]
- 17  
18 31. : Intensive Care National Audit & Research Centre; [Available from:  
19 <https://www.icnarc.org/Our-Audit/Audits/Cmp/Reports> accessed 20 November 2022.
- 20  
21 32. Burant CJ. Latent Growth Curve Models: Tracking Changes Over Time. *Int J Aging Hum*  
22 *Dev* 2016;82(4):336-50. doi: 10.1177/0091415016641692 [published Online First:  
23 2016/04/15]
- 24  
25 33. Curran PJ, Obeidat K, Losardo D. Twelve Frequently Asked Questions About Growth  
26 Curve Modeling. *J Cogn Dev* 2010;11(2):121-36. doi: 10.1080/15248371003699969  
27 [published Online First: 2010/01/01]
- 28  
29 34. Berlin KS, Parra GR, Williams NA. An introduction to latent variable mixture modeling  
30 (part 2): longitudinal latent class growth analysis and growth mixture models. *J*  
31 *Pediatr Psychol* 2014;39(2):188-203. doi: 10.1093/jpepsy/jst085 [published Online  
32 First: 2013/11/28]
- 33  
34 35. Hu Lt, Bentler PM. Cutoff criteria for fit indexes in covariance structure analysis:  
35 Conventional criteria versus new alternatives. *Structural Equation Modeling: A*  
36 *Multidisciplinary Journal* 1999;6(1):1-55. doi: 10.1080/10705519909540118
- 37  
38 36. Marsh HW, Hau K-T, Wen Z. In Search of Golden Rules: Comment on Hypothesis-  
39 Testing Approaches to Setting Cutoff Values for Fit Indexes and Dangers in  
40 Overgeneralizing Hu and Bentler's (1999) Findings. *Structural Equation Modeling: A*  
41 *Multidisciplinary Journal* 2004;11(3):320-41. doi: 10.1207/s15328007sem1103\_2
- 42  
43 37. Wen L, Terrera GM, Seaman SR. Methods for handling longitudinal outcome processes  
44 truncated by dropout and death. *Biostatistics* 2018;19(4):407-25. doi:  
45 10.1093/biostatistics/kxx045 [published Online First: 2017/10/14]
- 46  
47  
48  
49  
50  
51  
52  
53  
54  
55  
56  
57  
58  
59  
60

## PIM-COVID Study: SUPPLEMENTARY MATERIAL

### Cognitive Attentional Syndrome Scale-1 Revised (CAS-1R)

The author of the CAS-1R questionnaire has granted permission for the use of CAS-1R in the study but has stated '...the measure cannot be re-published or reproduced in a published paper as it is copyright protected and also part of the PATHWAY treatment manual that is protected by a non-disclosure'.

### PIM-COVID INTERVIEW GUIDE

Interviews will be arranged at a time convenient for the participant and will be conducted via telephone, an online secure platform (e.g. MS Teams or Zoom), or in person as per the participant's preference and current government guidance regarding lockdowns.

Closed questions are to be avoided as much as possible. To ensure that the research questions are addressed, a semi-structured approach should be used. Interruptions from the interview should be kept to a minimum, with the interviewer reflecting, prompting and summarising, with open or closed questions and probing where appropriate. Participants should be encouraged to speak about their specific experience.

Before the interview commences, ensure that the participant has read the information sheet. Questions and prompts below are resources on which the interviewer can draw and only relevant questions should be asked.

#### 1. Introduction

#### 2. Reassurance of confidentiality

Ensure the participant that their answers will be treated confidentially, and their interview will be anonymised before being analysed. Confidentiality will only be broken if they say something that indicates risk to themselves or others.

#### 3. Clarification of research aims and the interview purpose

#### 4. Time for questions from the participant about the interview and/or information sheet

Remind participants that the interview will be recorded.

## 5. Interview questions

The format and sequencing will be guided by the patient's responses.

- What has your experience been since leaving intensive care?
- What psychological and/or physical symptoms have you experienced, including:
  - Difficulty concentrating
  - Breathlessness
  - Coughing
  - Difficulties sleeping
  - Nightmares
  - Pain
  - Weakness
  - Fatigue
  - Intrusive thoughts
  - Seeing insects
- Have your psychological and/or physical symptoms changed over the course of your recovery?
  - If so, how?
- Do you think your physical symptoms (e.g. breathlessness, pain, weakness) have affected your mental well-being?
- How do you think that COVID-19 has affected your recovery, if at all?
- How have any of the following COVID-19 related factors influenced your recovery:
  - Restricted family/friend visiting whilst in hospital
  - Staff wearing PPE
  - Difficulty getting face to face appointments with your GP
  - Reminders about COVID-19 in the media.
  - Family support. Limits on family/friends visiting when at home because of lockdown. Or more family support because of furlough.
- What follow-up services have you been offered?
- Have you attended ICU follow-up clinic?
  - If no, why not?
  - If yes, did you find it helpful and what services were offered as part of that (ICU doctor, physio, dietician, respiratory physician)
- Were you given a phone number to contact for advice?
- Did you use it?
  - If no, why not?

- Is there any other support that you would have liked to have been offered?
- Were you contacted to attend a follow-up clinic? Would you have preferred to have been contacted once you got home (at an earlier time point than being invited for follow-up clinic)?
- At what time frame would you have found that helpful?
- What support do you think you would have benefitted from?
- Did you feel you knew what to expect during your recovery?
- Were you given any information regarding what experiences to expect during your recovery e.g. timespan / symptoms?
  - If so what information was given?
  - Were you satisfied with the information given?
- Specifically - were you given information about ICU recovery / ICUsteps / locally available support services?

#### 6. Close

- Is there anything else you would like to share?

Thanks for taking part.



# Reporting checklist for protocol of a clinical trial.

Based on the SPIRIT guidelines.

## Instructions to authors

Complete this checklist by entering the page numbers from your manuscript where readers will find each of the items listed below.

Your article may not currently address all the items on the checklist. Please modify your text to include the missing information. If you are certain that an item does not apply, please write "n/a" and provide a short explanation.

Upload your completed checklist as an extra file when you submit to a journal.

In your methods section, say that you used the SPIRIT reporting guidelines, and cite them as:

Chan A-W, Tetzlaff JM, Gøtzsche PC, Altman DG, Mann H, Berlin J, Dickersin K, Hróbjartsson A, Schulz KF, Parulekar WR, Krleža-Jerić K, Laupacis A, Moher D. SPIRIT 2013 Explanation and Elaboration: Guidance for protocols of clinical trials. *BMJ*. 2013;346:e7586

|                                             |                     | Reporting Item                                                                                               | Page Number |
|---------------------------------------------|---------------------|--------------------------------------------------------------------------------------------------------------|-------------|
| <b>Administrative information</b>           |                     |                                                                                                              |             |
| Title                                       | <a href="#">#1</a>  | Descriptive title identifying the study design, population, interventions, and, if applicable, trial acronym | 1           |
| Trial registration                          | <a href="#">#2a</a> | Trial identifier and registry name. If not yet registered, name of intended registry                         | 1           |
| Trial registration: data set                | <a href="#">#2b</a> | All items from the World Health Organization Trial Registration Data Set                                     | N/A         |
| Protocol version                            | <a href="#">#3</a>  | Date and version identifier                                                                                  | 1           |
| Funding                                     | <a href="#">#4</a>  | Sources and types of financial, material, and other support                                                  | 2           |
| Roles and responsibilities: contributorship | <a href="#">#5a</a> | Names, affiliations, and roles of protocol contributors                                                      | 2           |



|    |                           |                     |                                                                      |     |
|----|---------------------------|---------------------|----------------------------------------------------------------------|-----|
| 1  | Roles and                 | <a href="#">#5b</a> | Name and contact information for the trial sponsor                   | 2   |
| 2  | responsibilities:         |                     |                                                                      |     |
| 3  | sponsor contact           |                     |                                                                      |     |
| 4  | information               |                     |                                                                      |     |
| 5  |                           |                     |                                                                      |     |
| 6  |                           |                     |                                                                      |     |
| 7  |                           |                     |                                                                      |     |
| 8  | Roles and                 | <a href="#">#5c</a> | Role of study sponsor and funders, if any, in study design;          | 2   |
| 9  | responsibilities:         |                     | collection, management, analysis, and interpretation of data;        |     |
| 10 | sponsor and funder        |                     | writing of the report; and the decision to submit the report for     |     |
| 11 |                           |                     | publication, including whether they will have ultimate authority     |     |
| 12 |                           |                     | over any of these activities                                         |     |
| 13 |                           |                     |                                                                      |     |
| 14 |                           |                     |                                                                      |     |
| 15 |                           |                     |                                                                      |     |
| 16 | Roles and                 | <a href="#">#5d</a> | Composition, roles, and responsibilities of the coordinating centre, | N/A |
| 17 | responsibilities:         |                     | steering committee, endpoint adjudication committee, data            |     |
| 18 | committees                |                     | management team, and other individuals or groups overseeing the      |     |
| 19 |                           |                     | trial, if applicable (see Item 21a for data monitoring committee)    |     |
| 20 |                           |                     |                                                                      |     |
| 21 |                           |                     |                                                                      |     |
| 22 |                           |                     |                                                                      |     |
| 23 | <b>Introduction</b>       |                     |                                                                      |     |
| 24 |                           |                     |                                                                      |     |
| 25 | Background and            | <a href="#">#6a</a> | Description of research question and justification for undertaking   | 4   |
| 26 | rationale                 |                     | the trial, including summary of relevant studies (published and      |     |
| 27 |                           |                     | unpublished) examining benefits and harms for each intervention      |     |
| 28 |                           |                     |                                                                      |     |
| 29 |                           |                     |                                                                      |     |
| 30 | Background and            | <a href="#">#6b</a> | Explanation for choice of comparators                                | N/A |
| 31 | rationale: choice of      |                     |                                                                      |     |
| 32 | comparators               |                     |                                                                      |     |
| 33 |                           |                     |                                                                      |     |
| 34 |                           |                     |                                                                      |     |
| 35 |                           |                     |                                                                      |     |
| 36 | Objectives                | <a href="#">#7</a>  | Specific objectives or hypotheses                                    | 4   |
| 37 |                           |                     |                                                                      |     |
| 38 | Trial design              | <a href="#">#8</a>  | Description of trial design including type of trial (eg, parallel    | 5   |
| 39 |                           |                     | group, crossover, factorial, single group), allocation ratio, and    |     |
| 40 |                           |                     | framework (eg, superiority, equivalence, non-inferiority,            |     |
| 41 |                           |                     | exploratory)                                                         |     |
| 42 |                           |                     |                                                                      |     |
| 43 |                           |                     |                                                                      |     |
| 44 |                           |                     |                                                                      |     |
| 45 | <b>Methods:</b>           |                     |                                                                      |     |
| 46 | <b>Participants,</b>      |                     |                                                                      |     |
| 47 | <b>interventions, and</b> |                     |                                                                      |     |
| 48 | <b>outcomes</b>           |                     |                                                                      |     |
| 49 |                           |                     |                                                                      |     |
| 50 |                           |                     |                                                                      |     |
| 51 | Study setting             | <a href="#">#9</a>  | Description of study settings (eg, community clinic, academic        | 5   |
| 52 |                           |                     | hospital) and list of countries where data will be collected.        |     |
| 53 |                           |                     | Reference to where list of study sites can be obtained               |     |
| 54 |                           |                     |                                                                      |     |
| 55 |                           |                     |                                                                      |     |
| 56 |                           |                     |                                                                      |     |
| 57 | Eligibility criteria      | <a href="#">#10</a> | Inclusion and exclusion criteria for participants. If applicable,    | 12  |
| 58 |                           |                     | eligibility criteria for study centres and individuals who will      |     |
| 59 |                           |                     |                                                                      |     |
| 60 |                           |                     |                                                                      |     |

|    |                              |                                                                                            |     |
|----|------------------------------|--------------------------------------------------------------------------------------------|-----|
|    |                              | perform the interventions (eg, surgeons, psychotherapists)                                 |     |
| 1  |                              |                                                                                            |     |
| 2  | Interventions:               | <a href="#">#11a</a> Interventions for each group with sufficient detail to allow          | N/A |
| 3  | description                  | replication, including how and when they will be administered                              |     |
| 4  |                              |                                                                                            |     |
| 5  | Interventions:               | <a href="#">#11b</a> Criteria for discontinuing or modifying allocated interventions for a | N/A |
| 6  | modifications                | given trial participant (eg, drug dose change in response to harms,                        |     |
| 7  |                              | participant request, or improving / worsening disease)                                     |     |
| 8  |                              |                                                                                            |     |
| 9  | Interventions:               | <a href="#">#11c</a> Strategies to improve adherence to intervention protocols, and any    | N/A |
| 10 | adherence                    | procedures for monitoring adherence (eg, drug tablet return;                               |     |
| 11 |                              | laboratory tests)                                                                          |     |
| 12 | Interventions:               | <a href="#">#11d</a> Relevant concomitant care and interventions that are permitted or     | N/A |
| 13 | concomitant care             | prohibited during the trial                                                                |     |
| 14 |                              |                                                                                            |     |
| 15 | Outcomes                     | <a href="#">#12</a> Primary, secondary, and other outcomes, including the specific         | 5   |
| 16 |                              | measurement variable (eg, systolic blood pressure), analysis metric                        |     |
| 17 |                              | (eg, change from baseline, final value, time to event), method of                          |     |
| 18 |                              | aggregation (eg, median, proportion), and time point for each                              |     |
| 19 |                              | outcome. Explanation of the clinical relevance of chosen efficacy                          |     |
| 20 |                              | and harm outcomes is strongly recommended                                                  |     |
| 21 | Participant timeline         | <a href="#">#13</a> Time schedule of enrolment, interventions (including any run-ins       | 5   |
| 22 |                              | and washouts), assessments, and visits for participants. A                                 |     |
| 23 |                              | schematic diagram is highly recommended (see Figure)                                       |     |
| 24 |                              |                                                                                            |     |
| 25 | Sample size                  | <a href="#">#14</a> Estimated number of participants needed to achieve study               | N/A |
| 26 |                              | objectives and how it was determined, including clinical and                               |     |
| 27 |                              | statistical assumptions supporting any sample size calculations                            |     |
| 28 |                              |                                                                                            |     |
| 29 | Recruitment                  | <a href="#">#15</a> Strategies for achieving adequate participant enrolment to reach       | 5   |
| 30 |                              | target sample size                                                                         |     |
| 31 |                              |                                                                                            |     |
| 32 |                              |                                                                                            |     |
| 33 |                              |                                                                                            |     |
| 34 |                              |                                                                                            |     |
| 35 |                              |                                                                                            |     |
| 36 |                              |                                                                                            |     |
| 37 |                              |                                                                                            |     |
| 38 |                              |                                                                                            |     |
| 39 |                              |                                                                                            |     |
| 40 |                              |                                                                                            |     |
| 41 |                              |                                                                                            |     |
| 42 |                              |                                                                                            |     |
| 43 |                              |                                                                                            |     |
| 44 |                              |                                                                                            |     |
| 45 | <b>Methods: Assignment</b>   |                                                                                            |     |
| 46 | <b>of interventions (for</b> |                                                                                            |     |
| 47 | <b>controlled trials)</b>    |                                                                                            |     |
| 48 |                              |                                                                                            |     |
| 49 |                              |                                                                                            |     |
| 50 | Allocation: sequence         | <a href="#">#16a</a> Method of generating the allocation sequence (eg, computer-           | N/A |
| 51 | generation                   | generated random numbers), and list of any factors for                                     |     |
| 52 |                              | stratification. To reduce predictability of a random sequence,                             |     |
| 53 |                              | details of any planned restriction (eg, blocking) should be provided                       |     |
| 54 |                              | in a separate document that is unavailable to those who enrol                              |     |
| 55 |                              | participants or assign interventions                                                       |     |
| 56 |                              |                                                                                            |     |
| 57 |                              |                                                                                            |     |
| 58 |                              |                                                                                            |     |
| 59 |                              |                                                                                            |     |
| 60 |                              |                                                                                            |     |

|    |                        |                      |                                                                                                                                                                                                                                                                                                                                                                                                              |     |
|----|------------------------|----------------------|--------------------------------------------------------------------------------------------------------------------------------------------------------------------------------------------------------------------------------------------------------------------------------------------------------------------------------------------------------------------------------------------------------------|-----|
| 1  | Allocation concealment | <a href="#">#16b</a> | Mechanism of implementing the allocation sequence (eg, central telephone; sequentially numbered, opaque, sealed envelopes), describing any steps to conceal the sequence until interventions are assigned                                                                                                                                                                                                    | N/A |
| 2  | mechanism              |                      |                                                                                                                                                                                                                                                                                                                                                                                                              |     |
| 3  |                        |                      |                                                                                                                                                                                                                                                                                                                                                                                                              |     |
| 4  |                        |                      |                                                                                                                                                                                                                                                                                                                                                                                                              |     |
| 5  |                        |                      |                                                                                                                                                                                                                                                                                                                                                                                                              |     |
| 6  |                        |                      |                                                                                                                                                                                                                                                                                                                                                                                                              |     |
| 7  |                        |                      |                                                                                                                                                                                                                                                                                                                                                                                                              |     |
| 8  | Allocation:            | <a href="#">#16c</a> | Who will generate the allocation sequence, who will enrol participants, and who will assign participants to interventions                                                                                                                                                                                                                                                                                    | N/A |
| 9  | implementation         |                      |                                                                                                                                                                                                                                                                                                                                                                                                              |     |
| 10 |                        |                      |                                                                                                                                                                                                                                                                                                                                                                                                              |     |
| 11 |                        |                      |                                                                                                                                                                                                                                                                                                                                                                                                              |     |
| 12 | Blinding (masking)     | <a href="#">#17a</a> | Who will be blinded after assignment to interventions (eg, trial participants, care providers, outcome assessors, data analysts), and how                                                                                                                                                                                                                                                                    | N/A |
| 13 |                        |                      |                                                                                                                                                                                                                                                                                                                                                                                                              |     |
| 14 |                        |                      |                                                                                                                                                                                                                                                                                                                                                                                                              |     |
| 15 |                        |                      |                                                                                                                                                                                                                                                                                                                                                                                                              |     |
| 16 |                        |                      |                                                                                                                                                                                                                                                                                                                                                                                                              |     |
| 17 | Blinding (masking):    | <a href="#">#17b</a> | If blinded, circumstances under which unblinding is permissible, and procedure for revealing a participant's allocated intervention during the trial                                                                                                                                                                                                                                                         | N/A |
| 18 | emergency unblinding   |                      |                                                                                                                                                                                                                                                                                                                                                                                                              |     |
| 19 |                        |                      |                                                                                                                                                                                                                                                                                                                                                                                                              |     |
| 20 |                        |                      |                                                                                                                                                                                                                                                                                                                                                                                                              |     |
| 21 |                        |                      |                                                                                                                                                                                                                                                                                                                                                                                                              |     |
| 22 | <b>Methods: Data</b>   |                      |                                                                                                                                                                                                                                                                                                                                                                                                              |     |
| 23 | <b>collection,</b>     |                      |                                                                                                                                                                                                                                                                                                                                                                                                              |     |
| 24 | <b>management, and</b> |                      |                                                                                                                                                                                                                                                                                                                                                                                                              |     |
| 25 | <b>analysis</b>        |                      |                                                                                                                                                                                                                                                                                                                                                                                                              |     |
| 26 |                        |                      |                                                                                                                                                                                                                                                                                                                                                                                                              |     |
| 27 |                        |                      |                                                                                                                                                                                                                                                                                                                                                                                                              |     |
| 28 |                        |                      |                                                                                                                                                                                                                                                                                                                                                                                                              |     |
| 29 | Data collection plan   | <a href="#">#18a</a> | Plans for assessment and collection of outcome, baseline, and other trial data, including any related processes to promote data quality (eg, duplicate measurements, training of assessors) and a description of study instruments (eg, questionnaires, laboratory tests) along with their reliability and validity, if known. Reference to where data collection forms can be found, if not in the protocol | 7   |
| 30 |                        |                      |                                                                                                                                                                                                                                                                                                                                                                                                              |     |
| 31 |                        |                      |                                                                                                                                                                                                                                                                                                                                                                                                              |     |
| 32 |                        |                      |                                                                                                                                                                                                                                                                                                                                                                                                              |     |
| 33 |                        |                      |                                                                                                                                                                                                                                                                                                                                                                                                              |     |
| 34 |                        |                      |                                                                                                                                                                                                                                                                                                                                                                                                              |     |
| 35 |                        |                      |                                                                                                                                                                                                                                                                                                                                                                                                              |     |
| 36 |                        |                      |                                                                                                                                                                                                                                                                                                                                                                                                              |     |
| 37 |                        |                      |                                                                                                                                                                                                                                                                                                                                                                                                              |     |
| 38 |                        |                      |                                                                                                                                                                                                                                                                                                                                                                                                              |     |
| 39 | Data collection plan:  | <a href="#">#18b</a> | Plans to promote participant retention and complete follow-up, including list of any outcome data to be collected for participants who discontinue or deviate from intervention protocols                                                                                                                                                                                                                    | N/A |
| 40 | retention              |                      |                                                                                                                                                                                                                                                                                                                                                                                                              |     |
| 41 |                        |                      |                                                                                                                                                                                                                                                                                                                                                                                                              |     |
| 42 |                        |                      |                                                                                                                                                                                                                                                                                                                                                                                                              |     |
| 43 |                        |                      |                                                                                                                                                                                                                                                                                                                                                                                                              |     |
| 44 | Data management        | <a href="#">#19</a>  | Plans for data entry, coding, security, and storage, including any related processes to promote data quality (eg, double data entry; range checks for data values). Reference to where details of data management procedures can be found, if not in the protocol                                                                                                                                            | 7   |
| 45 |                        |                      |                                                                                                                                                                                                                                                                                                                                                                                                              |     |
| 46 |                        |                      |                                                                                                                                                                                                                                                                                                                                                                                                              |     |
| 47 |                        |                      |                                                                                                                                                                                                                                                                                                                                                                                                              |     |
| 48 |                        |                      |                                                                                                                                                                                                                                                                                                                                                                                                              |     |
| 49 |                        |                      |                                                                                                                                                                                                                                                                                                                                                                                                              |     |
| 50 |                        |                      |                                                                                                                                                                                                                                                                                                                                                                                                              |     |
| 51 | Statistics: outcomes   | <a href="#">#20a</a> | Statistical methods for analysing primary and secondary outcomes. Reference to where other details of the statistical analysis plan can be found, if not in the protocol                                                                                                                                                                                                                                     | 9   |
| 52 |                        |                      |                                                                                                                                                                                                                                                                                                                                                                                                              |     |
| 53 |                        |                      |                                                                                                                                                                                                                                                                                                                                                                                                              |     |
| 54 |                        |                      |                                                                                                                                                                                                                                                                                                                                                                                                              |     |
| 55 |                        |                      |                                                                                                                                                                                                                                                                                                                                                                                                              |     |
| 56 | Statistics: additional | <a href="#">#20b</a> | Methods for any additional analyses (eg, subgroup and adjusted analyses)                                                                                                                                                                                                                                                                                                                                     | 10  |
| 57 | analyses               |                      |                                                                                                                                                                                                                                                                                                                                                                                                              |     |
| 58 |                        |                      |                                                                                                                                                                                                                                                                                                                                                                                                              |     |
| 59 |                        |                      |                                                                                                                                                                                                                                                                                                                                                                                                              |     |
| 60 |                        |                      |                                                                                                                                                                                                                                                                                                                                                                                                              |     |

|    |                            |                      |                                                                         |     |
|----|----------------------------|----------------------|-------------------------------------------------------------------------|-----|
| 1  | Statistics: analysis       | <a href="#">#20c</a> | Definition of analysis population relating to protocol non-             | 10  |
| 2  | population and missing     |                      | adherence (eg, as randomised analysis), and any statistical methods     |     |
| 3  | data                       |                      | to handle missing data (eg, multiple imputation)                        |     |
| 4  |                            |                      |                                                                         |     |
| 5  |                            |                      |                                                                         |     |
| 6  | <b>Methods: Monitoring</b> |                      |                                                                         |     |
| 7  |                            |                      |                                                                         |     |
| 8  |                            |                      |                                                                         |     |
| 9  | Data monitoring:           | <a href="#">#21a</a> | Composition of data monitoring committee (DMC); summary of its          | N/A |
| 10 | formal committee           |                      | role and reporting structure; statement of whether it is independent    |     |
| 11 |                            |                      | from the sponsor and competing interests; and reference to where        |     |
| 12 |                            |                      | further details about its charter can be found, if not in the protocol. |     |
| 13 |                            |                      | Alternatively, an explanation of why a DMC is not needed                |     |
| 14 |                            |                      |                                                                         |     |
| 15 |                            |                      |                                                                         |     |
| 16 |                            |                      |                                                                         |     |
| 17 | Data monitoring:           | <a href="#">#21b</a> | Description of any interim analyses and stopping guidelines,            | N/A |
| 18 | interim analysis           |                      | including who will have access to these interim results and make        |     |
| 19 |                            |                      | the final decision to terminate the trial                               |     |
| 20 |                            |                      |                                                                         |     |
| 21 |                            |                      |                                                                         |     |
| 22 | Harms                      | <a href="#">#22</a>  | Plans for collecting, assessing, reporting, and managing solicited      | N/A |
| 23 |                            |                      | and spontaneously reported adverse events and other unintended          |     |
| 24 |                            |                      | effects of trial interventions or trial conduct                         |     |
| 25 |                            |                      |                                                                         |     |
| 26 |                            |                      |                                                                         |     |
| 27 |                            |                      |                                                                         |     |
| 28 | Auditing                   | <a href="#">#23</a>  | Frequency and procedures for auditing trial conduct, if any, and        | N/A |
| 29 |                            |                      | whether the process will be independent from investigators and the      |     |
| 30 |                            |                      | sponsor                                                                 |     |
| 31 |                            |                      |                                                                         |     |
| 32 |                            |                      |                                                                         |     |
| 33 | <b>Ethics and</b>          |                      |                                                                         |     |
| 34 | <b>dissemination</b>       |                      |                                                                         |     |
| 35 |                            |                      |                                                                         |     |
| 36 |                            |                      |                                                                         |     |
| 37 | Research ethics            | <a href="#">#24</a>  | Plans for seeking research ethics committee / institutional review      | 11  |
| 38 | approval                   |                      | board (REC / IRB) approval                                              |     |
| 39 |                            |                      |                                                                         |     |
| 40 |                            |                      |                                                                         |     |
| 41 | Protocol amendments        | <a href="#">#25</a>  | Plans for communicating important protocol modifications (eg,           | N/A |
| 42 |                            |                      | changes to eligibility criteria, outcomes, analyses) to relevant        |     |
| 43 |                            |                      | parties (eg, investigators, REC / IRBs, trial participants, trial       |     |
| 44 |                            |                      | registries, journals, regulators)                                       |     |
| 45 |                            |                      |                                                                         |     |
| 46 |                            |                      |                                                                         |     |
| 47 | Consent or assent          | <a href="#">#26a</a> | Who will obtain informed consent or assent from potential trial         | 7   |
| 48 |                            |                      | participants or authorised surrogates, and how (see Item 32)            |     |
| 49 |                            |                      |                                                                         |     |
| 50 |                            |                      |                                                                         |     |
| 51 | Consent or assent:         | <a href="#">#26b</a> | Additional consent provisions for collection and use of participant     | 8   |
| 52 | ancillary studies          |                      | data and biological specimens in ancillary studies, if applicable       |     |
| 53 |                            |                      |                                                                         |     |
| 54 |                            |                      |                                                                         |     |
| 55 | Confidentiality            | <a href="#">#27</a>  | How personal information about potential and enrolled participants      | 7   |
| 56 |                            |                      | will be collected, shared, and maintained in order to protect           |     |
| 57 |                            |                      | confidentiality before, during, and after the trial                     |     |
| 58 |                            |                      |                                                                         |     |
| 59 |                            |                      |                                                                         |     |
| 60 |                            |                      |                                                                         |     |

|    |                                             |                      |                                                                                                                                                                                                                                                                                     |     |
|----|---------------------------------------------|----------------------|-------------------------------------------------------------------------------------------------------------------------------------------------------------------------------------------------------------------------------------------------------------------------------------|-----|
| 1  | Declaration of interests                    | <a href="#">#28</a>  | Financial and other competing interests for principal investigators for the overall trial and each study site                                                                                                                                                                       | 11  |
| 2  |                                             |                      |                                                                                                                                                                                                                                                                                     |     |
| 3  |                                             |                      |                                                                                                                                                                                                                                                                                     |     |
| 4  | Data access                                 | <a href="#">#29</a>  | Statement of who will have access to the final trial dataset, and disclosure of contractual agreements that limit such access for investigators                                                                                                                                     | 11  |
| 5  |                                             |                      |                                                                                                                                                                                                                                                                                     |     |
| 6  |                                             |                      |                                                                                                                                                                                                                                                                                     |     |
| 7  |                                             |                      |                                                                                                                                                                                                                                                                                     |     |
| 8  |                                             |                      |                                                                                                                                                                                                                                                                                     |     |
| 9  |                                             |                      |                                                                                                                                                                                                                                                                                     |     |
| 10 | Ancillary and post trial care               | <a href="#">#30</a>  | Provisions, if any, for ancillary and post-trial care, and for compensation to those who suffer harm from trial participation                                                                                                                                                       | N/A |
| 11 |                                             |                      |                                                                                                                                                                                                                                                                                     |     |
| 12 |                                             |                      |                                                                                                                                                                                                                                                                                     |     |
| 13 |                                             |                      |                                                                                                                                                                                                                                                                                     |     |
| 14 | Dissemination policy: trial results         | <a href="#">#31a</a> | Plans for investigators and sponsor to communicate trial results to participants, healthcare professionals, the public, and other relevant groups (eg, via publication, reporting in results databases, or other data sharing arrangements), including any publication restrictions | N/A |
| 15 |                                             |                      |                                                                                                                                                                                                                                                                                     |     |
| 16 |                                             |                      |                                                                                                                                                                                                                                                                                     |     |
| 17 |                                             |                      |                                                                                                                                                                                                                                                                                     |     |
| 18 |                                             |                      |                                                                                                                                                                                                                                                                                     |     |
| 19 |                                             |                      |                                                                                                                                                                                                                                                                                     |     |
| 20 |                                             |                      |                                                                                                                                                                                                                                                                                     |     |
| 21 | Dissemination policy: authorship            | <a href="#">#31b</a> | Authorship eligibility guidelines and any intended use of professional writers                                                                                                                                                                                                      | N/A |
| 22 |                                             |                      |                                                                                                                                                                                                                                                                                     |     |
| 23 |                                             |                      |                                                                                                                                                                                                                                                                                     |     |
| 24 | Dissemination policy: reproducible research | <a href="#">#31c</a> | Plans, if any, for granting public access to the full protocol, participant-level dataset, and statistical code                                                                                                                                                                     | 11  |
| 25 |                                             |                      |                                                                                                                                                                                                                                                                                     |     |
| 26 |                                             |                      |                                                                                                                                                                                                                                                                                     |     |
| 27 |                                             |                      |                                                                                                                                                                                                                                                                                     |     |
| 28 | <b>Appendices</b>                           |                      |                                                                                                                                                                                                                                                                                     |     |
| 29 |                                             |                      |                                                                                                                                                                                                                                                                                     |     |
| 30 |                                             |                      |                                                                                                                                                                                                                                                                                     |     |
| 31 | Informed consent materials                  | <a href="#">#32</a>  | Model consent form and other related documentation given to participants and authorised surrogates                                                                                                                                                                                  | N/A |
| 32 |                                             |                      |                                                                                                                                                                                                                                                                                     |     |
| 33 |                                             |                      |                                                                                                                                                                                                                                                                                     |     |
| 34 | Biological specimens                        | <a href="#">#33</a>  | Plans for collection, laboratory evaluation, and storage of biological specimens for genetic or molecular analysis in the current trial and for future use in ancillary studies, if applicable                                                                                      | N/A |
| 35 |                                             |                      |                                                                                                                                                                                                                                                                                     |     |
| 36 |                                             |                      |                                                                                                                                                                                                                                                                                     |     |
| 37 |                                             |                      |                                                                                                                                                                                                                                                                                     |     |
| 38 |                                             |                      |                                                                                                                                                                                                                                                                                     |     |
| 39 |                                             |                      |                                                                                                                                                                                                                                                                                     |     |

40 The SPIRIT Explanation and Elaboration paper is distributed under the terms of the Creative Commons  
 41 Attribution License CC-BY-NC. This checklist was completed on 08. January 2023 using  
 42 <https://www.goodreports.org/>, a tool made by the [EQUATOR Network](#) in collaboration with [Penelope.ai](#)  
 43  
 44  
 45  
 46  
 47  
 48  
 49  
 50  
 51  
 52  
 53  
 54  
 55  
 56  
 57  
 58  
 59
